# Supplementary material for: Reattachable fiducial skin marker for automatic multimodality registration
Source: Springer Nature journal article supplement (doi:10.1007/s11548-022-02639-7), 2022-05-23
Supplement: 11548_2022_2639_MOESM6_ESM.pdf [file 11548_2022_2639_MOESM6_ESM.pdf]

**Table of contents**

\PHYSIK

E010

Gnirs

BPL\_Beekley\_Planeboard\_Session1\_normal

|                |      |
|----------------|------|
| localizer      | _BPL |
| localizer      | _BPL |
| 6_20_1PLANE_T1 |      |
| 6_20_1PLANE_T2 |      |
| 6_20_2PLANE_T1 |      |
| 6_20_2PLANE_T2 |      |
| 6_20_3PLANE_T1 |      |
| 6_20_3PLANE_T2 |      |
| 6_20_4PLANE_T1 |      |
| 6_20_4PLANE_T2 |      |
| 6_20_5PLANE_T1 |      |
| 6_20_5PLANE_T2 |      |
| 6_20_6PLANE_T1 |      |
| 6_20_6PLANE_T2 |      |

\\PHYSIK\E010\Gnirs\BPL\_Beekley\_Planeboard\_Session1\_normal\localizer\_BPL

TA: 0:22 PM: ISO Voxel size: 0.6×0.6×8.0 mmPAT: Off Rel. SNR: 1.00 : fl

**Properties**

|                                               |                    |
|-----------------------------------------------|--------------------|
| Prio recon                                    | Off                |
| Load images to viewer                         | On                 |
| Inline movie                                  | Off                |
| Auto store images                             | On                 |
| Load images to stamp segments                 | On                 |
| Load images to graphic segments               | On                 |
| Auto open inline display                      | Off                |
| Auto close inline display                     | On                 |
| Start measurement without further preparation | On                 |
| Wait for user to start                        | Off                |
| Start measurements                            | Single measurement |

**Routine**

|                    |                                                                  |
|--------------------|------------------------------------------------------------------|
| Slice group        | 1                                                                |
| Slices             | 5                                                                |
| Dist. factor       | 300 %                                                            |
| Position           | L0.0 P64.1 H1.4 mm                                               |
| Orientation        | Coronal                                                          |
| Phase enc. dir.    | R >> L                                                           |
| Slice group        | 2                                                                |
| Slices             | 3                                                                |
| Dist. factor       | 20 %                                                             |
| Position           | L0.0 P64.1 H1.4 mm                                               |
| Orientation        | Sagittal                                                         |
| Phase enc. dir.    | A >> P                                                           |
| AutoAlign          | ---                                                              |
| Phase oversampling | 0 %                                                              |
| FoV read           | 320 mm                                                           |
| FoV phase          | 100.0 %                                                          |
| Slice thickness    | 8.0 mm                                                           |
| TR                 | 7.0 ms                                                           |
| TE                 | 2.38 ms                                                          |
| Averages           | 2                                                                |
| Concatenations     | 8                                                                |
| Filter             | Distortion Corr.(2D),<br>Prescan Normalize,<br>Elliptical filter |
| Coil elements      | BO1-3;SP3,4                                                      |

**Contrast - Common**

|                   |         |
|-------------------|---------|
| TR                | 7.0 ms  |
| TE                | 2.38 ms |
| TD                | 0 ms    |
| MTC               | Off     |
| Magn. preparation | None    |
| Flip angle        | 20 deg  |
| Fat suppr.        | None    |
| Water suppr.      | None    |
| SWI               | Off     |

**Contrast - Dynamic**

|                 |            |
|-----------------|------------|
| Averages        | 2          |
| Averaging mode  | Short term |
| Reconstruction  | Magnitude  |
| Measurements    | 1          |
| Multiple series | Off        |

**Resolution - Common**

|           |         |
|-----------|---------|
| FoV read  | 320 mm  |
| FoV phase | 100.0 % |

**Resolution - Common**

|                       |        |
|-----------------------|--------|
| Slice thickness       | 8.0 mm |
| Base resolution       | 256    |
| Phase resolution      | 71 %   |
| Phase partial Fourier | Off    |
| Interpolation         | On     |

**Resolution - iPAT**

|          |      |
|----------|------|
| PAT mode | None |
|----------|------|

**Resolution - Filter Image**

|                   |     |
|-------------------|-----|
| Image Filter      | Off |
| Distortion Corr.  | On  |
| Mode              | 2D  |
| Unfiltered images | Off |
| Prescan Normalize | On  |
| Unfiltered images | Off |
| Normalize         | Off |
| B1 filter         | Off |

**Resolution - Filter Rawdata**

|                   |     |
|-------------------|-----|
| Raw filter        | Off |
| Elliptical filter | On  |

**Geometry - Common**

|                  |                    |
|------------------|--------------------|
| Slice group      | 1                  |
| Slices           | 5                  |
| Dist. factor     | 300 %              |
| Position         | L0.0 P64.1 H1.4 mm |
| Orientation      | Coronal            |
| Phase enc. dir.  | R >> L             |
| Slice group      | 2                  |
| Slices           | 3                  |
| Dist. factor     | 20 %               |
| Position         | L0.0 P64.1 H1.4 mm |
| Orientation      | Sagittal           |
| Phase enc. dir.  | A >> P             |
| FoV read         | 320 mm             |
| FoV phase        | 100.0 %            |
| Slice thickness  | 8.0 mm             |
| TR               | 7.0 ms             |
| Multi-slice mode | Sequential         |
| Series           | Interleaved        |
| Concatenations   | 8                  |

**Geometry - AutoAlign**

|                     |                    |
|---------------------|--------------------|
| Slice group         | 1                  |
| Position            | L0.0 P64.1 H1.4 mm |
| Orientation         | Coronal            |
| Phase enc. dir.     | R >> L             |
| Slice group         | 2                  |
| Position            | L0.0 P64.1 H1.4 mm |
| Orientation         | Sagittal           |
| Phase enc. dir.     | A >> P             |
| AutoAlign           | ---                |
| Initial Position    | L0.0 P64.1 H1.4    |
| L                   | 0.0 mm             |
| P                   | 64.1 mm            |
| H                   | 1.4 mm             |
| Initial Rotation    | 0.00 deg           |
| Initial Orientation | Coronal            |

**Geometry - Saturation**

|                 |          |
|-----------------|----------|
| Saturation mode | Standard |
| Fat suppr.      | None     |
| Water suppr.    | None     |
| Special sat.    | None     |

**Geometry - Tim Planning Suite**

|                   |      |
|-------------------|------|
| Set-n-Go Protocol | Off  |
| Table position    | H    |
| Table position    | 1 mm |
| Inline Composing  | Off  |

**System - Miscellaneous**

|                     |                      |
|---------------------|----------------------|
| Positioning mode    | ISO                  |
| Table position      | H                    |
| Table position      | 1 mm                 |
| MSMA                | S - C - T            |
| Sagittal            | R >> L               |
| Coronal             | A >> P               |
| Transversal         | H >> F               |
| Coil Combine Mode   | Adaptive Combine     |
| Save uncombined     | Off                  |
| Matrix Optimization | Off                  |
| Coil Focus          | Flat                 |
| AutoAlign           | ---                  |
| Coil Select Mode    | Off - AutoCoilSelect |

**System - Adjustments**

|                          |         |
|--------------------------|---------|
| B0 Shim mode             | Tune up |
| Adjust with body coil    | Off     |
| Confirm freq. adjustment | Off     |
| Assume Dominant Fat      | Off     |
| Assume Silicone          | Off     |
| Adjustment Tolerance     | Auto    |

**System - Adjust Volume**

|             |             |
|-------------|-------------|
| Position    | Isocenter   |
| Orientation | Transversal |
| Rotation    | 0.00 deg    |
| A >> P      | 263 mm      |
| R >> L      | 350 mm      |
| F >> H      | 350 mm      |
| Reset       | Off         |

**System - Tx/Rx**

|                     |               |
|---------------------|---------------|
| Frequency 1H        | 63.685812 MHz |
| Correction factor   | 1             |
| Gain                | High          |
| Img. Scale Cor.     | 1.000         |
| Reset               | Off           |
| ? Ref. amplitude 1H | 0.000 V       |

**Physio - Signal1**

|                 |        |
|-----------------|--------|
| 1st Signal/Mode | None   |
| TR              | 7.0 ms |
| Concatenations  | 8      |
| Segments        | 1      |

**Physio - Cardiac**

|                   |         |
|-------------------|---------|
| Magn. preparation | None    |
| Fat suppr.        | None    |
| Dark blood        | Off     |
| FoV read          | 320 mm  |
| FoV phase         | 100.0 % |

**Physio - Cardiac**

|                  |      |
|------------------|------|
| Phase resolution | 71 % |
|------------------|------|

**Physio - PACE**

|                |     |
|----------------|-----|
| Resp. control  | Off |
| Concatenations | 8   |

**Inline - Common**

|                      |     |
|----------------------|-----|
| Subtract             | Off |
| Measurements         | 1   |
| StdDev               | Off |
| Liver registration   | Off |
| Save original images | On  |

**Inline - MIP**

|                      |     |
|----------------------|-----|
| MIP-Sag              | Off |
| MIP-Cor              | Off |
| MIP-Tra              | Off |
| MIP-Time             | Off |
| Save original images | On  |

**Inline - Soft Tissue**

|              |     |
|--------------|-----|
| Wash - In    | Off |
| Wash - Out   | Off |
| TTP          | Off |
| PEI          | Off |
| MIP - time   | Off |
| Measurements | 1   |

**Inline - Composing**

|                   |     |
|-------------------|-----|
| Inline Composing  | Off |
| Distortion Corr.  | On  |
| Mode              | 2D  |
| Unfiltered images | Off |

**Inline - MapIt**

|                      |         |
|----------------------|---------|
| Save original images | On      |
| MapIt                | None    |
| Flip angle           | 20 deg  |
| Measurements         | 1       |
| Contrasts            | 1       |
| TR                   | 7.0 ms  |
| TE                   | 2.38 ms |

**Sequence - Part 1**

|                     |            |
|---------------------|------------|
| Introduction        | On         |
| Dimension           | 2D         |
| Phase stabilisation | Off        |
| Asymmetric echo     | Allowed    |
| Contrasts           | 1          |
| Flow comp.          | No         |
| Multi-slice mode    | Sequential |
| Bandwidth           | 300 Hz/Px  |

**Sequence - Part 2**

|                          |            |
|--------------------------|------------|
| Segments                 | 1          |
| Acoustic noise reduction | None       |
| RF pulse type            | Fast       |
| Gradient mode            | Normal     |
| Excitation               | Slice-sel. |
| RF spoiling              | On         |

**Sequence - Assistant**

|      |     |
|------|-----|
| Mode | Off |
|------|-----|

\\PHYSIK\E010\Gnirs\BPL\_Beekley\_Planeboard\_Session1\_normal\localizer\_BPL

TA: 0:32 PM: ISO Voxel size: 0.6×0.6×8.0 mmPAT: Off Rel. SNR: 1.00 : fl

**Properties**

|                                               |                    |
|-----------------------------------------------|--------------------|
| Prio recon                                    | Off                |
| Load images to viewer                         | On                 |
| Inline movie                                  | Off                |
| Auto store images                             | On                 |
| Load images to stamp segments                 | On                 |
| Load images to graphic segments               | On                 |
| Auto open inline display                      | Off                |
| Auto close inline display                     | On                 |
| Start measurement without further preparation | On                 |
| Wait for user to start                        | Off                |
| Start measurements                            | Single measurement |

**Routine**

|                    |                                                                  |
|--------------------|------------------------------------------------------------------|
| Slice group        | 1                                                                |
| Slices             | 9                                                                |
| Dist. factor       | 200 %                                                            |
| Position           | L0.0 P64.1 H1.4 mm                                               |
| Orientation        | Coronal                                                          |
| Phase enc. dir.    | R >> L                                                           |
| Slice group        | 2                                                                |
| Slices             | 3                                                                |
| Dist. factor       | 20 %                                                             |
| Position           | L0.0 P64.1 H1.4 mm                                               |
| Orientation        | Sagittal                                                         |
| Phase enc. dir.    | A >> P                                                           |
| AutoAlign          | ---                                                              |
| Phase oversampling | 0 %                                                              |
| FoV read           | 320 mm                                                           |
| FoV phase          | 100.0 %                                                          |
| Slice thickness    | 8.0 mm                                                           |
| TR                 | 7.0 ms                                                           |
| TE                 | 2.38 ms                                                          |
| Averages           | 2                                                                |
| Concatenations     | 12                                                               |
| Filter             | Distortion Corr.(2D),<br>Prescan Normalize,<br>Elliptical filter |
| Coil elements      | BO1-3;SP3,4                                                      |

**Contrast - Common**

|                   |         |
|-------------------|---------|
| TR                | 7.0 ms  |
| TE                | 2.38 ms |
| TD                | 0 ms    |
| MTC               | Off     |
| Magn. preparation | None    |
| Flip angle        | 20 deg  |
| Fat suppr.        | None    |
| Water suppr.      | None    |
| SWI               | Off     |

**Contrast - Dynamic**

|                 |            |
|-----------------|------------|
| Averages        | 2          |
| Averaging mode  | Short term |
| Reconstruction  | Magnitude  |
| Measurements    | 1          |
| Multiple series | Off        |

**Resolution - Common**

|           |         |
|-----------|---------|
| FoV read  | 320 mm  |
| FoV phase | 100.0 % |

**Resolution - Common**

|                       |        |
|-----------------------|--------|
| Slice thickness       | 8.0 mm |
| Base resolution       | 256    |
| Phase resolution      | 71 %   |
| Phase partial Fourier | Off    |
| Interpolation         | On     |

**Resolution - iPAT**

|          |      |
|----------|------|
| PAT mode | None |
|----------|------|

**Resolution - Filter Image**

|                   |     |
|-------------------|-----|
| Image Filter      | Off |
| Distortion Corr.  | On  |
| Mode              | 2D  |
| Unfiltered images | Off |
| Prescan Normalize | On  |
| Unfiltered images | Off |
| Normalize         | Off |
| B1 filter         | Off |

**Resolution - Filter Rawdata**

|                   |     |
|-------------------|-----|
| Raw filter        | Off |
| Elliptical filter | On  |

**Geometry - Common**

|                  |                    |
|------------------|--------------------|
| Slice group      | 1                  |
| Slices           | 9                  |
| Dist. factor     | 200 %              |
| Position         | L0.0 P64.1 H1.4 mm |
| Orientation      | Coronal            |
| Phase enc. dir.  | R >> L             |
| Slice group      | 2                  |
| Slices           | 3                  |
| Dist. factor     | 20 %               |
| Position         | L0.0 P64.1 H1.4 mm |
| Orientation      | Sagittal           |
| Phase enc. dir.  | A >> P             |
| FoV read         | 320 mm             |
| FoV phase        | 100.0 %            |
| Slice thickness  | 8.0 mm             |
| TR               | 7.0 ms             |
| Multi-slice mode | Sequential         |
| Series           | Interleaved        |
| Concatenations   | 12                 |

**Geometry - AutoAlign**

|                     |                    |
|---------------------|--------------------|
| Slice group         | 1                  |
| Position            | L0.0 P64.1 H1.4 mm |
| Orientation         | Coronal            |
| Phase enc. dir.     | R >> L             |
| Slice group         | 2                  |
| Position            | L0.0 P64.1 H1.4 mm |
| Orientation         | Sagittal           |
| Phase enc. dir.     | A >> P             |
| AutoAlign           | ---                |
| Initial Position    | L0.0 P64.1 H1.4    |
| L                   | 0.0 mm             |
| P                   | 64.1 mm            |
| H                   | 1.4 mm             |
| Initial Rotation    | 0.00 deg           |
| Initial Orientation | Coronal            |

**Geometry - Saturation**

|                 |          |
|-----------------|----------|
| Saturation mode | Standard |
| Fat suppr.      | None     |
| Water suppr.    | None     |
| Special sat.    | None     |

**Geometry - Tim Planning Suite**

|                   |      |
|-------------------|------|
| Set-n-Go Protocol | Off  |
| Table position    | H    |
| Table position    | 1 mm |
| Inline Composing  | Off  |

**System - Miscellaneous**

|                     |                      |
|---------------------|----------------------|
| Positioning mode    | ISO                  |
| Table position      | H                    |
| Table position      | 1 mm                 |
| MSMA                | S - C - T            |
| Sagittal            | R >> L               |
| Coronal             | A >> P               |
| Transversal         | H >> F               |
| Coil Combine Mode   | Adaptive Combine     |
| Save uncombined     | Off                  |
| Matrix Optimization | Off                  |
| Coil Focus          | Flat                 |
| AutoAlign           | ---                  |
| Coil Select Mode    | Off - AutoCoilSelect |

**System - Adjustments**

|                          |         |
|--------------------------|---------|
| B0 Shim mode             | Tune up |
| Adjust with body coil    | Off     |
| Confirm freq. adjustment | Off     |
| Assume Dominant Fat      | Off     |
| Assume Silicone          | Off     |
| Adjustment Tolerance     | Auto    |

**System - Adjust Volume**

|             |             |
|-------------|-------------|
| Position    | Isocenter   |
| Orientation | Transversal |
| Rotation    | 0.00 deg    |
| A >> P      | 263 mm      |
| R >> L      | 350 mm      |
| F >> H      | 350 mm      |
| Reset       | Off         |

**System - Tx/Rx**

|                     |               |
|---------------------|---------------|
| Frequency 1H        | 63.685812 MHz |
| Correction factor   | 1             |
| Gain                | High          |
| Img. Scale Cor.     | 1.000         |
| Reset               | Off           |
| ? Ref. amplitude 1H | 0.000 V       |

**Physio - Signal1**

|                 |        |
|-----------------|--------|
| 1st Signal/Mode | None   |
| TR              | 7.0 ms |
| Concatenations  | 12     |
| Segments        | 1      |

**Physio - Cardiac**

|                   |         |
|-------------------|---------|
| Magn. preparation | None    |
| Fat suppr.        | None    |
| Dark blood        | Off     |
| FoV read          | 320 mm  |
| FoV phase         | 100.0 % |

**Physio - Cardiac**

|                  |      |
|------------------|------|
| Phase resolution | 71 % |
|------------------|------|

**Physio - PACE**

|                |     |
|----------------|-----|
| Resp. control  | Off |
| Concatenations | 12  |

**Inline - Common**

|                      |     |
|----------------------|-----|
| Subtract             | Off |
| Measurements         | 1   |
| StdDev               | Off |
| Liver registration   | Off |
| Save original images | On  |

**Inline - MIP**

|                      |     |
|----------------------|-----|
| MIP-Sag              | Off |
| MIP-Cor              | Off |
| MIP-Tra              | Off |
| MIP-Time             | Off |
| Save original images | On  |

**Inline - Soft Tissue**

|              |     |
|--------------|-----|
| Wash - In    | Off |
| Wash - Out   | Off |
| TTP          | Off |
| PEI          | Off |
| MIP - time   | Off |
| Measurements | 1   |

**Inline - Composing**

|                   |     |
|-------------------|-----|
| Inline Composing  | Off |
| Distortion Corr.  | On  |
| Mode              | 2D  |
| Unfiltered images | Off |

**Inline - MapIt**

|                      |         |
|----------------------|---------|
| Save original images | On      |
| MapIt                | None    |
| Flip angle           | 20 deg  |
| Measurements         | 1       |
| Contrasts            | 1       |
| TR                   | 7.0 ms  |
| TE                   | 2.38 ms |

**Sequence - Part 1**

|                     |            |
|---------------------|------------|
| Introduction        | On         |
| Dimension           | 2D         |
| Phase stabilisation | Off        |
| Asymmetric echo     | Allowed    |
| Contrasts           | 1          |
| Flow comp.          | No         |
| Multi-slice mode    | Sequential |
| Bandwidth           | 300 Hz/Px  |

**Sequence - Part 2**

|                          |            |
|--------------------------|------------|
| Segments                 | 1          |
| Acoustic noise reduction | None       |
| RF pulse type            | Fast       |
| Gradient mode            | Normal     |
| Excitation               | Slice-sel. |
| RF spoiling              | On         |

**Sequence - Assistant**

|      |     |
|------|-----|
| Mode | Off |
|------|-----|

\\PHYSIK\E010\Gnirs\BPL\_Beekeley\_Planeboard\_Session1\_normal\6\_20\_1PLANE\_T1

TA: 8:12 PM: ISO Voxel size: 0.5×0.5×1.0 mmPAT: 2 Rel. SNR: 1.00 : tfl

**Properties**

|                                               |                    |
|-----------------------------------------------|--------------------|
| Prio recon                                    | Off                |
| Load images to viewer                         | On                 |
| Inline movie                                  | Off                |
| Auto store images                             | On                 |
| Load images to stamp segments                 | On                 |
| Load images to graphic segments               | Off                |
| Auto open inline display                      | Off                |
| Auto close inline display                     | On                 |
| Start measurement without further preparation | Off                |
| Wait for user to start                        | Off                |
| Start measurements                            | Single measurement |

**Routine**

|                    |                                                                  |
|--------------------|------------------------------------------------------------------|
| Slab group         | 1                                                                |
| Slabs              | 1                                                                |
| Dist. factor       | 50 %                                                             |
| Position           | Isocenter                                                        |
| Orientation        | Sagittal                                                         |
| Phase enc. dir.    | A >> P                                                           |
| AutoAlign          | Head > Brain                                                     |
| Phase oversampling | 50 %                                                             |
| Slice oversampling | 0.0 %                                                            |
| Slices per slab    | 320                                                              |
| FoV read           | 320 mm                                                           |
| FoV phase          | 100.0 %                                                          |
| Slice thickness    | 1.00 mm                                                          |
| TR                 | 1880.0 ms                                                        |
| TE                 | 2.63 ms                                                          |
| Averages           | 1                                                                |
| Concatenations     | 1                                                                |
| Filter             | Distortion Corr.(2D),<br>Prescan Normalize,<br>Elliptical filter |
| Coil elements      | BO1-3;SP3-5                                                      |

**Contrast - Common**

|                   |             |
|-------------------|-------------|
| TR                | 1880.0 ms   |
| TE                | 2.63 ms     |
| Magn. preparation | Non-sel. IR |
| T1                | 1030 ms     |
| Flip angle        | 12 deg      |
| Fat suppr.        | None        |
| Water suppr.      | None        |

**Contrast - Dynamic**

|                 |           |
|-----------------|-----------|
| Averages        | 1         |
| Averaging mode  | Long term |
| Reconstruction  | Magnitude |
| Measurements    | 1         |
| Multiple series | Off       |

**Resolution - Common**

|                       |         |
|-----------------------|---------|
| FoV read              | 320 mm  |
| FoV phase             | 100.0 % |
| Slice thickness       | 1.00 mm |
| Base resolution       | 320     |
| Phase resolution      | 100 %   |
| Slice resolution      | 80 %    |
| Phase partial Fourier | Off     |
| Slice partial Fourier | Off     |

**Resolution - Common**

|               |    |
|---------------|----|
| Interpolation | On |
|---------------|----|

**Resolution - iPAT**

|                     |            |
|---------------------|------------|
| PAT mode            | GRAPPA     |
| Accel. factor PE    | 2          |
| Ref. lines PE       | 45         |
| Accel. factor 3D    | 1          |
| Reference scan mode | Integrated |

**Resolution - Filter Image**

|                   |     |
|-------------------|-----|
| Image Filter      | Off |
| Distortion Corr.  | On  |
| Mode              | 2D  |
| Unfiltered images | Off |
| Prescan Normalize | On  |
| Unfiltered images | Off |
| Normalize         | Off |
| B1 filter         | Off |

**Resolution - Filter Rawdata**

|                   |     |
|-------------------|-----|
| Raw filter        | Off |
| Elliptical filter | On  |

**Geometry - Common**

|                    |             |
|--------------------|-------------|
| Slab group         | 1           |
| Slabs              | 1           |
| Dist. factor       | 50 %        |
| Position           | Isocenter   |
| Orientation        | Sagittal    |
| Phase enc. dir.    | A >> P      |
| Slice oversampling | 0.0 %       |
| Slices per slab    | 320         |
| FoV read           | 320 mm      |
| FoV phase          | 100.0 %     |
| Slice thickness    | 1.00 mm     |
| TR                 | 1880.0 ms   |
| Multi-slice mode   | Single shot |
| Series             | Ascending   |
| Concatenations     | 1           |

**Geometry - AutoAlign**

|                     |                |
|---------------------|----------------|
| Slab group          | 1              |
| Position            | Isocenter      |
| Orientation         | Sagittal       |
| Phase enc. dir.     | A >> P         |
| AutoAlign           | Head > Brain   |
| Initial Position    | L0.0 P0.0 H3.0 |
| L                   | 0.0 mm         |
| P                   | 0.0 mm         |
| H                   | 3.0 mm         |
| Initial Rotation    | -0.01 deg      |
| Initial Orientation | Sagittal       |

**Geometry - Navigator****Geometry - Tim Planning Suite**

|                   |      |
|-------------------|------|
| Set-n-Go Protocol | Off  |
| Table position    | H    |
| Table position    | 3 mm |
| Inline Composing  | Off  |

**System - Miscellaneous**

|                     |                  |
|---------------------|------------------|
| Positioning mode    | ISO              |
| Table position      | H                |
| Table position      | 3 mm             |
| MSMA                | S - C - T        |
| Sagittal            | R >> L           |
| Coronal             | A >> P           |
| Transversal         | F >> H           |
| Coil Combine Mode   | Adaptive Combine |
| Save uncombined     | Off              |
| Matrix Optimization | Off              |
| Coil Focus          | Flat             |
| AutoAlign           | Head > Brain     |
| Coil Select Mode    | Default          |

**System - Adjustments**

|                          |         |
|--------------------------|---------|
| B0 Shim mode             | Tune up |
| Adjust with body coil    | Off     |
| Confirm freq. adjustment | Off     |
| Assume Dominant Fat      | Off     |
| Assume Silicone          | Off     |
| Adjustment Tolerance     | Auto    |

**System - Adjust Volume**

|             |             |
|-------------|-------------|
| Position    | Isocenter   |
| Orientation | Transversal |
| Rotation    | 0.00 deg    |
| A >> P      | 263 mm      |
| R >> L      | 350 mm      |
| F >> H      | 350 mm      |
| Reset       | Off         |

**System - Tx/Rx**

|                     |               |
|---------------------|---------------|
| Frequency 1H        | 63.685812 MHz |
| Correction factor   | 1             |
| Gain                | Low           |
| Img. Scale Cor.     | 1.000         |
| Reset               | Off           |
| ? Ref. amplitude 1H | 0.000 V       |

**Physio - Signal1**

|                 |           |
|-----------------|-----------|
| 1st Signal/Mode | None      |
| TR              | 1880.0 ms |
| Concatenations  | 1         |

**Physio - Cardiac**

|                   |             |
|-------------------|-------------|
| Magn. preparation | Non-sel. IR |
| TI                | 1030 ms     |
| Fat suppr.        | None        |
| Dark blood        | Off         |
| FoV read          | 320 mm      |
| FoV phase         | 100.0 %     |
| Phase resolution  | 100 %       |

**Physio - PACE**

|                |     |
|----------------|-----|
| Resp. control  | Off |
| Concatenations | 1   |

**Inline - Common**

|                |     |
|----------------|-----|
| Subtract       | On  |
| Save images    | On  |
| Autoscaling    | Off |
| Scaling factor | 1   |
| Offset         | 0   |

**Inline - Common**

|                      |     |
|----------------------|-----|
| Subtrahend           | 1   |
| Subtraction group    | 1   |
| Measurements         | 1   |
| StdDev               | Off |
| Save original images | On  |

**Inline - MIP**

|                      |     |
|----------------------|-----|
| MIP-Sag              | Off |
| MIP-Cor              | Off |
| MIP-Tra              | Off |
| MIP-Time             | Off |
| Save original images | On  |

**Inline - Composing**

|                   |     |
|-------------------|-----|
| Inline Composing  | Off |
| Distortion Corr.  | On  |
| Mode              | 2D  |
| Unfiltered images | Off |

**Inline - MapIt**

|                      |           |
|----------------------|-----------|
| Save original images | On        |
| MapIt                | None      |
| Flip angle           | 12 deg    |
| Measurements         | 1         |
| TR                   | 1880.0 ms |
| TE                   | 2.63 ms   |

**Sequence - Part 1**

|                     |             |
|---------------------|-------------|
| Introduction        | On          |
| Dimension           | 3D          |
| Elliptical scanning | Off         |
| Reordering          | Linear      |
| Asymmetric echo     | Allowed     |
| Flow comp.          | No          |
| Multi-slice mode    | Single shot |
| Echo spacing        | 6.6 ms      |
| Bandwidth           | 200 Hz/Px   |

**Sequence - Part 2**

|                         |           |
|-------------------------|-----------|
| RF pulse type           | Fast      |
| Gradient mode           | Fast      |
| Excitation              | Slab-sel. |
| RF spoiling             | On        |
| Incr. Gradient spoiling | Off       |
| Turbo factor            | 256       |

**Sequence - Assistant**

|      |     |
|------|-----|
| Mode | Off |
|------|-----|

\\PHYSIK\E010\Gnirs\BPL\_Beekley\_Planeboard\_Session1\_normal\6\_20\_1PLANE\_T2

TA: 9:16 PM: FIX Voxel size: 0.4x0.4x4.0 mmPAT: 2 Rel. SNR: 1.00 : tseR

**Properties**

|                                               |                    |
|-----------------------------------------------|--------------------|
| Prio recon                                    | Off                |
| Load images to viewer                         | On                 |
| Inline movie                                  | Off                |
| Auto store images                             | On                 |
| Load images to stamp segments                 | On                 |
| Load images to graphic segments               | Off                |
| Auto open inline display                      | Off                |
| Auto close inline display                     | Off                |
| Start measurement without further preparation | Off                |
| Wait for user to start                        | Off                |
| Start measurements                            | Single measurement |

**Routine**

|                    |                                                                  |
|--------------------|------------------------------------------------------------------|
| Slice group        | 1                                                                |
| Slices             | 80                                                               |
| Dist. factor       | 0 %                                                              |
| Position           | Isocenter                                                        |
| Orientation        | Sagittal                                                         |
| Phase enc. dir.    | H >> F                                                           |
| AutoAlign          | Head > Brain                                                     |
| Phase oversampling | 0 %                                                              |
| FoV read           | 320 mm                                                           |
| FoV phase          | 100.0 %                                                          |
| Slice thickness    | 4.0 mm                                                           |
| TR                 | 6450.0 ms                                                        |
| TE                 | 107.0 ms                                                         |
| Averages           | 3                                                                |
| Concatenations     | 2                                                                |
| Filter             | Distortion Corr.(2D),<br>Prescan Normalize,<br>Elliptical filter |
| Coil elements      | BO1-3;SP3-5                                                      |

**Contrast - Common**

|                   |           |
|-------------------|-----------|
| TR                | 6450.0 ms |
| TE                | 107.0 ms  |
| TD                | 0.0 ms    |
| MTC               | Off       |
| Magn. preparation | None      |
| Flip angle        | 180 deg   |
| Fat suppr.        | None      |
| Water suppr.      | None      |
| Restore magn.     | On        |

**Contrast - Dynamic**

|                 |                  |
|-----------------|------------------|
| Averages        | 3                |
| Averaging mode  | Short term       |
| Reconstruction  | Magnitude        |
| Measurements    | 1                |
| Multiple series | Each measurement |

**Resolution - Common**

|                       |           |
|-----------------------|-----------|
| FoV read              | 320 mm    |
| FoV phase             | 100.0 %   |
| Slice thickness       | 4.0 mm    |
| Base resolution       | 448       |
| Phase resolution      | 90 %      |
| Phase partial Fourier | Off       |
| Trajectory            | Cartesian |
| Interpolation         | On        |

**Resolution - iPAT**

|                     |                  |
|---------------------|------------------|
| PAT mode            | GRAPPA           |
| Accel. factor PE    | 2                |
| Ref. lines PE       | 32               |
| Reference scan mode | Self-calibration |

**Resolution - Filter Image**

|                   |     |
|-------------------|-----|
| Image Filter      | Off |
| Distortion Corr.  | On  |
| Mode              | 2D  |
| Unfiltered images | Off |
| Prescan Normalize | On  |
| Unfiltered images | Off |
| Normalize         | Off |
| B1 filter         | Off |

**Resolution - Filter Rawdata**

|                   |     |
|-------------------|-----|
| Raw filter        | Off |
| Elliptical filter | On  |

**Geometry - Common**

|                  |             |
|------------------|-------------|
| Slice group      | 1           |
| Slices           | 80          |
| Dist. factor     | 0 %         |
| Position         | Isocenter   |
| Orientation      | Sagittal    |
| Phase enc. dir.  | H >> F      |
| FoV read         | 320 mm      |
| FoV phase        | 100.0 %     |
| Slice thickness  | 4.0 mm      |
| TR               | 6450.0 ms   |
| Multi-slice mode | Interleaved |
| Series           | Interleaved |
| Concatenations   | 2           |

**Geometry - AutoAlign**

|                     |              |
|---------------------|--------------|
| Slice group         | 1            |
| Position            | Isocenter    |
| Orientation         | Sagittal     |
| Phase enc. dir.     | H >> F       |
| AutoAlign           | Head > Brain |
| Initial Position    | Isocenter    |
| L                   | 0.0 mm       |
| P                   | 0.0 mm       |
| H                   | 0.0 mm       |
| Initial Rotation    | 89.99 deg    |
| Initial Orientation | Sagittal     |

**Geometry - Saturation**

|               |      |
|---------------|------|
| Fat suppr.    | None |
| Water suppr.  | None |
| Restore magn. | On   |
| Special sat.  | None |

**Geometry - Navigator****Geometry - Tim Planning Suite**

|                   |      |
|-------------------|------|
| Set-n-Go Protocol | Off  |
| Table position    | H    |
| Table position    | 3 mm |
| Inline Composing  | Off  |



**System - Miscellaneous**

|                     |                  |
|---------------------|------------------|
| Positioning mode    | FIX              |
| Table position      | H                |
| Table position      | 3 mm             |
| MSMA                | S - C - T        |
| Sagittal            | R >> L           |
| Coronal             | A >> P           |
| Transversal         | F >> H           |
| Coil Combine Mode   | Adaptive Combine |
| Save uncombined     | Off              |
| Matrix Optimization | Off              |
| Coil Focus          | Flat             |
| AutoAlign           | Head > Brain     |
| Coil Select Mode    | Default          |

**System - Adjustments**

|                          |         |
|--------------------------|---------|
| B0 Shim mode             | Tune up |
| Adjust with body coil    | Off     |
| Confirm freq. adjustment | Off     |
| Assume Dominant Fat      | Off     |
| Assume Silicone          | Off     |
| Adjustment Tolerance     | Auto    |

**System - Adjust Volume**

|             |             |
|-------------|-------------|
| Position    | Isocenter   |
| Orientation | Transversal |
| Rotation    | 0.00 deg    |
| A >> P      | 263 mm      |
| R >> L      | 350 mm      |
| F >> H      | 350 mm      |
| Reset       | Off         |

**System - Tx/Rx**

|                     |               |
|---------------------|---------------|
| Frequency 1H        | 63.685812 MHz |
| Correction factor   | 1             |
| Gain                | High          |
| Img. Scale Cor.     | 1.000         |
| Reset               | Off           |
| ? Ref. amplitude 1H | 0.000 V       |

**Physio - Signal1**

|                 |           |
|-----------------|-----------|
| 1st Signal/Mode | None      |
| TR              | 6450.0 ms |
| Concatenations  | 2         |

**Physio - Cardiac**

|                   |           |
|-------------------|-----------|
| Magn. preparation | None      |
| Fat suppr.        | None      |
| Dark blood        | Off       |
| FoV read          | 320 mm    |
| FoV phase         | 100.0 %   |
| Phase resolution  | 90 %      |
| Trajectory        | Cartesian |

**Physio - PACE**

|                |     |
|----------------|-----|
| Resp. control  | Off |
| Concatenations | 2   |

**Inline - Common**

|                      |     |
|----------------------|-----|
| Subtract             | Off |
| Measurements         | 1   |
| StdDev               | Off |
| Save original images | On  |

**Inline - MIP**

|                      |     |
|----------------------|-----|
| MIP-Sag              | Off |
| MIP-Cor              | Off |
| MIP-Tra              | Off |
| MIP-Time             | Off |
| Save original images | On  |

**Inline - Composing**

|                   |     |
|-------------------|-----|
| Inline Composing  | Off |
| Distortion Corr.  | On  |
| Mode              | 2D  |
| Unfiltered images | Off |

**Sequence - Part 1**

|                     |             |
|---------------------|-------------|
| Introduction        | On          |
| Dimension           | 2D          |
| Compensate T2 decay | Off         |
| Reduce Motion Sens. | On          |
| Contrasts           | 1           |
| Flow comp.          | No          |
| Multi-slice mode    | Interleaved |
| Free echo spacing   | Off         |
| Echo spacing        | 9.74 ms     |
| Bandwidth           | 199 Hz/Px   |

**Sequence - Part 2**

|                          |              |
|--------------------------|--------------|
| Define                   | Turbo factor |
| Echo trains per slice    | 14           |
| Phase correction         | Automatic    |
| Acoustic noise reduction | None         |
| RF pulse type            | Normal       |
| Gradient mode            | Normal       |
| WARP                     | Off          |
| Red. EC sensitivity      | Off          |
| Turbo factor             | 15           |

**Sequence - Assistant**

|               |      |
|---------------|------|
| Mode          | Off  |
| Allowed delay | 30 s |

\\PHYSIK\E010\Gnirs\BPL\_Beekeley\_Planeboard\_Session1\_normal\6\_20\_2PLANE\_T1

TA: 8:12 PM: ISO Voxel size: 0.5×0.5×1.0 mmPAT: 2 Rel. SNR: 1.00 : tfl

**Properties**

|                                               |                    |
|-----------------------------------------------|--------------------|
| Prio recon                                    | Off                |
| Load images to viewer                         | On                 |
| Inline movie                                  | Off                |
| Auto store images                             | On                 |
| Load images to stamp segments                 | On                 |
| Load images to graphic segments               | Off                |
| Auto open inline display                      | Off                |
| Auto close inline display                     | On                 |
| Start measurement without further preparation | Off                |
| Wait for user to start                        | Off                |
| Start measurements                            | Single measurement |

**Routine**

|                    |                                                                  |
|--------------------|------------------------------------------------------------------|
| Slab group         | 1                                                                |
| Slabs              | 1                                                                |
| Dist. factor       | 50 %                                                             |
| Position           | Isocenter                                                        |
| Orientation        | Sagittal                                                         |
| Phase enc. dir.    | A >> P                                                           |
| AutoAlign          | Head > Brain                                                     |
| Phase oversampling | 50 %                                                             |
| Slice oversampling | 0.0 %                                                            |
| Slices per slab    | 320                                                              |
| FoV read           | 320 mm                                                           |
| FoV phase          | 100.0 %                                                          |
| Slice thickness    | 1.00 mm                                                          |
| TR                 | 1880.0 ms                                                        |
| TE                 | 2.63 ms                                                          |
| Averages           | 1                                                                |
| Concatenations     | 1                                                                |
| Filter             | Distortion Corr.(2D),<br>Prescan Normalize,<br>Elliptical filter |
| Coil elements      | BO1-3;SP3-5                                                      |

**Contrast - Common**

|                   |             |
|-------------------|-------------|
| TR                | 1880.0 ms   |
| TE                | 2.63 ms     |
| Magn. preparation | Non-sel. IR |
| T1                | 1030 ms     |
| Flip angle        | 12 deg      |
| Fat suppr.        | None        |
| Water suppr.      | None        |

**Contrast - Dynamic**

|                 |           |
|-----------------|-----------|
| Averages        | 1         |
| Averaging mode  | Long term |
| Reconstruction  | Magnitude |
| Measurements    | 1         |
| Multiple series | Off       |

**Resolution - Common**

|                       |         |
|-----------------------|---------|
| FoV read              | 320 mm  |
| FoV phase             | 100.0 % |
| Slice thickness       | 1.00 mm |
| Base resolution       | 320     |
| Phase resolution      | 100 %   |
| Slice resolution      | 80 %    |
| Phase partial Fourier | Off     |
| Slice partial Fourier | Off     |

**Resolution - Common**

|               |    |
|---------------|----|
| Interpolation | On |
|---------------|----|

**Resolution - iPAT**

|                     |            |
|---------------------|------------|
| PAT mode            | GRAPPA     |
| Accel. factor PE    | 2          |
| Ref. lines PE       | 45         |
| Accel. factor 3D    | 1          |
| Reference scan mode | Integrated |

**Resolution - Filter Image**

|                   |     |
|-------------------|-----|
| Image Filter      | Off |
| Distortion Corr.  | On  |
| Mode              | 2D  |
| Unfiltered images | Off |
| Prescan Normalize | On  |
| Unfiltered images | Off |
| Normalize         | Off |
| B1 filter         | Off |

**Resolution - Filter Rawdata**

|                   |     |
|-------------------|-----|
| Raw filter        | Off |
| Elliptical filter | On  |

**Geometry - Common**

|                    |             |
|--------------------|-------------|
| Slab group         | 1           |
| Slabs              | 1           |
| Dist. factor       | 50 %        |
| Position           | Isocenter   |
| Orientation        | Sagittal    |
| Phase enc. dir.    | A >> P      |
| Slice oversampling | 0.0 %       |
| Slices per slab    | 320         |
| FoV read           | 320 mm      |
| FoV phase          | 100.0 %     |
| Slice thickness    | 1.00 mm     |
| TR                 | 1880.0 ms   |
| Multi-slice mode   | Single shot |
| Series             | Ascending   |
| Concatenations     | 1           |

**Geometry - AutoAlign**

|                     |                |
|---------------------|----------------|
| Slab group          | 1              |
| Position            | Isocenter      |
| Orientation         | Sagittal       |
| Phase enc. dir.     | A >> P         |
| AutoAlign           | Head > Brain   |
| Initial Position    | L0.0 P0.0 H3.0 |
| L                   | 0.0 mm         |
| P                   | 0.0 mm         |
| H                   | 3.0 mm         |
| Initial Rotation    | -0.01 deg      |
| Initial Orientation | Sagittal       |

**Geometry - Navigator****Geometry - Tim Planning Suite**

|                   |      |
|-------------------|------|
| Set-n-Go Protocol | Off  |
| Table position    | H    |
| Table position    | 3 mm |
| Inline Composing  | Off  |

**System - Miscellaneous**

|                     |                  |
|---------------------|------------------|
| Positioning mode    | ISO              |
| Table position      | H                |
| Table position      | 3 mm             |
| MSMA                | S - C - T        |
| Sagittal            | R >> L           |
| Coronal             | A >> P           |
| Transversal         | F >> H           |
| Coil Combine Mode   | Adaptive Combine |
| Save uncombined     | Off              |
| Matrix Optimization | Off              |
| Coil Focus          | Flat             |
| AutoAlign           | Head > Brain     |
| Coil Select Mode    | Default          |

**System - Adjustments**

|                          |         |
|--------------------------|---------|
| B0 Shim mode             | Tune up |
| Adjust with body coil    | Off     |
| Confirm freq. adjustment | Off     |
| Assume Dominant Fat      | Off     |
| Assume Silicone          | Off     |
| Adjustment Tolerance     | Auto    |

**System - Adjust Volume**

|             |             |
|-------------|-------------|
| Position    | Isocenter   |
| Orientation | Transversal |
| Rotation    | 0.00 deg    |
| A >> P      | 263 mm      |
| R >> L      | 350 mm      |
| F >> H      | 350 mm      |
| Reset       | Off         |

**System - Tx/Rx**

|                     |               |
|---------------------|---------------|
| Frequency 1H        | 63.685812 MHz |
| Correction factor   | 1             |
| Gain                | Low           |
| Img. Scale Cor.     | 1.000         |
| Reset               | Off           |
| ? Ref. amplitude 1H | 0.000 V       |

**Physio - Signal1**

|                 |           |
|-----------------|-----------|
| 1st Signal/Mode | None      |
| TR              | 1880.0 ms |
| Concatenations  | 1         |

**Physio - Cardiac**

|                   |             |
|-------------------|-------------|
| Magn. preparation | Non-sel. IR |
| TI                | 1030 ms     |
| Fat suppr.        | None        |
| Dark blood        | Off         |
| FoV read          | 320 mm      |
| FoV phase         | 100.0 %     |
| Phase resolution  | 100 %       |

**Physio - PACE**

|                |     |
|----------------|-----|
| Resp. control  | Off |
| Concatenations | 1   |

**Inline - Common**

|                |     |
|----------------|-----|
| Subtract       | On  |
| Save images    | On  |
| Autoscaling    | Off |
| Scaling factor | 1   |
| Offset         | 0   |

**Inline - Common**

|                      |     |
|----------------------|-----|
| Subtrahend           | 1   |
| Subtraction group    | 1   |
| Measurements         | 1   |
| StdDev               | Off |
| Save original images | On  |

**Inline - MIP**

|                      |     |
|----------------------|-----|
| MIP-Sag              | Off |
| MIP-Cor              | Off |
| MIP-Tra              | Off |
| MIP-Time             | Off |
| Save original images | On  |

**Inline - Composing**

|                   |     |
|-------------------|-----|
| Inline Composing  | Off |
| Distortion Corr.  | On  |
| Mode              | 2D  |
| Unfiltered images | Off |

**Inline - MapIt**

|                      |           |
|----------------------|-----------|
| Save original images | On        |
| MapIt                | None      |
| Flip angle           | 12 deg    |
| Measurements         | 1         |
| TR                   | 1880.0 ms |
| TE                   | 2.63 ms   |

**Sequence - Part 1**

|                     |             |
|---------------------|-------------|
| Introduction        | On          |
| Dimension           | 3D          |
| Elliptical scanning | Off         |
| Reordering          | Linear      |
| Asymmetric echo     | Allowed     |
| Flow comp.          | No          |
| Multi-slice mode    | Single shot |
| Echo spacing        | 6.6 ms      |
| Bandwidth           | 200 Hz/Px   |

**Sequence - Part 2**

|                         |           |
|-------------------------|-----------|
| RF pulse type           | Fast      |
| Gradient mode           | Fast      |
| Excitation              | Slab-sel. |
| RF spoiling             | On        |
| Incr. Gradient spoiling | Off       |
| Turbo factor            | 256       |

**Sequence - Assistant**

|      |     |
|------|-----|
| Mode | Off |
|------|-----|

\\PHYSIK\E010\Gnirs\BPL\_Beekley\_Planeboard\_Session1\_normal\6\_20\_2PLANE\_T2

TA: 9:16 PM: FIX Voxel size: 0.4x0.4x4.0 mmPAT: 2 Rel. SNR: 1.00 : tseR

**Properties**

|                                               |                    |
|-----------------------------------------------|--------------------|
| Prio recon                                    | Off                |
| Load images to viewer                         | On                 |
| Inline movie                                  | Off                |
| Auto store images                             | On                 |
| Load images to stamp segments                 | On                 |
| Load images to graphic segments               | Off                |
| Auto open inline display                      | Off                |
| Auto close inline display                     | Off                |
| Start measurement without further preparation | Off                |
| Wait for user to start                        | Off                |
| Start measurements                            | Single measurement |

**Routine**

|                    |                                                                  |
|--------------------|------------------------------------------------------------------|
| Slice group        | 1                                                                |
| Slices             | 80                                                               |
| Dist. factor       | 0 %                                                              |
| Position           | Isocenter                                                        |
| Orientation        | Sagittal                                                         |
| Phase enc. dir.    | H >> F                                                           |
| AutoAlign          | Head > Brain                                                     |
| Phase oversampling | 0 %                                                              |
| FoV read           | 320 mm                                                           |
| FoV phase          | 100.0 %                                                          |
| Slice thickness    | 4.0 mm                                                           |
| TR                 | 6450.0 ms                                                        |
| TE                 | 107.0 ms                                                         |
| Averages           | 3                                                                |
| Concatenations     | 2                                                                |
| Filter             | Distortion Corr.(2D),<br>Prescan Normalize,<br>Elliptical filter |
| Coil elements      | BO1-3;SP3-5                                                      |

**Contrast - Common**

|                   |           |
|-------------------|-----------|
| TR                | 6450.0 ms |
| TE                | 107.0 ms  |
| TD                | 0.0 ms    |
| MTC               | Off       |
| Magn. preparation | None      |
| Flip angle        | 180 deg   |
| Fat suppr.        | None      |
| Water suppr.      | None      |
| Restore magn.     | On        |

**Contrast - Dynamic**

|                 |                  |
|-----------------|------------------|
| Averages        | 3                |
| Averaging mode  | Short term       |
| Reconstruction  | Magnitude        |
| Measurements    | 1                |
| Multiple series | Each measurement |

**Resolution - Common**

|                       |           |
|-----------------------|-----------|
| FoV read              | 320 mm    |
| FoV phase             | 100.0 %   |
| Slice thickness       | 4.0 mm    |
| Base resolution       | 448       |
| Phase resolution      | 90 %      |
| Phase partial Fourier | Off       |
| Trajectory            | Cartesian |
| Interpolation         | On        |

**Resolution - iPAT**

|                     |                  |
|---------------------|------------------|
| PAT mode            | GRAPPA           |
| Accel. factor PE    | 2                |
| Ref. lines PE       | 32               |
| Reference scan mode | Self-calibration |

**Resolution - Filter Image**

|                   |     |
|-------------------|-----|
| Image Filter      | Off |
| Distortion Corr.  | On  |
| Mode              | 2D  |
| Unfiltered images | Off |
| Prescan Normalize | On  |
| Unfiltered images | Off |
| Normalize         | Off |
| B1 filter         | Off |

**Resolution - Filter Rawdata**

|                   |     |
|-------------------|-----|
| Raw filter        | Off |
| Elliptical filter | On  |

**Geometry - Common**

|                  |             |
|------------------|-------------|
| Slice group      | 1           |
| Slices           | 80          |
| Dist. factor     | 0 %         |
| Position         | Isocenter   |
| Orientation      | Sagittal    |
| Phase enc. dir.  | H >> F      |
| FoV read         | 320 mm      |
| FoV phase        | 100.0 %     |
| Slice thickness  | 4.0 mm      |
| TR               | 6450.0 ms   |
| Multi-slice mode | Interleaved |
| Series           | Interleaved |
| Concatenations   | 2           |

**Geometry - AutoAlign**

|                     |              |
|---------------------|--------------|
| Slice group         | 1            |
| Position            | Isocenter    |
| Orientation         | Sagittal     |
| Phase enc. dir.     | H >> F       |
| AutoAlign           | Head > Brain |
| Initial Position    | Isocenter    |
| L                   | 0.0 mm       |
| P                   | 0.0 mm       |
| H                   | 0.0 mm       |
| Initial Rotation    | 89.99 deg    |
| Initial Orientation | Sagittal     |

**Geometry - Saturation**

|               |      |
|---------------|------|
| Fat suppr.    | None |
| Water suppr.  | None |
| Restore magn. | On   |
| Special sat.  | None |

**Geometry - Navigator****Geometry - Tim Planning Suite**

|                   |      |
|-------------------|------|
| Set-n-Go Protocol | Off  |
| Table position    | H    |
| Table position    | 3 mm |
| Inline Composing  | Off  |

**System - Miscellaneous**

|                     |                  |
|---------------------|------------------|
| Positioning mode    | FIX              |
| Table position      | H                |
| Table position      | 3 mm             |
| MSMA                | S - C - T        |
| Sagittal            | R >> L           |
| Coronal             | A >> P           |
| Transversal         | F >> H           |
| Coil Combine Mode   | Adaptive Combine |
| Save uncombined     | Off              |
| Matrix Optimization | Off              |
| Coil Focus          | Flat             |
| AutoAlign           | Head > Brain     |
| Coil Select Mode    | Default          |

**System - Adjustments**

|                          |         |
|--------------------------|---------|
| B0 Shim mode             | Tune up |
| Adjust with body coil    | Off     |
| Confirm freq. adjustment | Off     |
| Assume Dominant Fat      | Off     |
| Assume Silicone          | Off     |
| Adjustment Tolerance     | Auto    |

**System - Adjust Volume**

|             |             |
|-------------|-------------|
| Position    | Isocenter   |
| Orientation | Transversal |
| Rotation    | 0.00 deg    |
| A >> P      | 263 mm      |
| R >> L      | 350 mm      |
| F >> H      | 350 mm      |
| Reset       | Off         |

**System - Tx/Rx**

|                     |               |
|---------------------|---------------|
| Frequency 1H        | 63.685812 MHz |
| Correction factor   | 1             |
| Gain                | High          |
| Img. Scale Cor.     | 1.000         |
| Reset               | Off           |
| ? Ref. amplitude 1H | 0.000 V       |

**Physio - Signal1**

|                 |           |
|-----------------|-----------|
| 1st Signal/Mode | None      |
| TR              | 6450.0 ms |
| Concatenations  | 2         |

**Physio - Cardiac**

|                   |           |
|-------------------|-----------|
| Magn. preparation | None      |
| Fat suppr.        | None      |
| Dark blood        | Off       |
| FoV read          | 320 mm    |
| FoV phase         | 100.0 %   |
| Phase resolution  | 90 %      |
| Trajectory        | Cartesian |

**Physio - PACE**

|                |     |
|----------------|-----|
| Resp. control  | Off |
| Concatenations | 2   |

**Inline - Common**

|                      |     |
|----------------------|-----|
| Subtract             | Off |
| Measurements         | 1   |
| StdDev               | Off |
| Save original images | On  |

**Inline - MIP**

|                      |     |
|----------------------|-----|
| MIP-Sag              | Off |
| MIP-Cor              | Off |
| MIP-Tra              | Off |
| MIP-Time             | Off |
| Save original images | On  |

**Inline - Composing**

|                   |     |
|-------------------|-----|
| Inline Composing  | Off |
| Distortion Corr.  | On  |
| Mode              | 2D  |
| Unfiltered images | Off |

**Sequence - Part 1**

|                     |             |
|---------------------|-------------|
| Introduction        | On          |
| Dimension           | 2D          |
| Compensate T2 decay | Off         |
| Reduce Motion Sens. | On          |
| Contrasts           | 1           |
| Flow comp.          | No          |
| Multi-slice mode    | Interleaved |
| Free echo spacing   | Off         |
| Echo spacing        | 9.74 ms     |
| Bandwidth           | 199 Hz/Px   |

**Sequence - Part 2**

|                          |              |
|--------------------------|--------------|
| Define                   | Turbo factor |
| Echo trains per slice    | 14           |
| Phase correction         | Automatic    |
| Acoustic noise reduction | None         |
| RF pulse type            | Normal       |
| Gradient mode            | Normal       |
| WARP                     | Off          |
| Red. EC sensitivity      | Off          |
| Turbo factor             | 15           |

**Sequence - Assistant**

|               |      |
|---------------|------|
| Mode          | Off  |
| Allowed delay | 30 s |

\\PHYSIK\E010\Gnirs\BPL\_Beekeley\_Planeboard\_Session1\_normal\6\_20\_3PLANE\_T1

TA: 8:12 PM: ISO Voxel size: 0.5×0.5×1.0 mmPAT: 2 Rel. SNR: 1.00 : tfl

**Properties**

|                                               |                    |
|-----------------------------------------------|--------------------|
| Prio recon                                    | Off                |
| Load images to viewer                         | On                 |
| Inline movie                                  | Off                |
| Auto store images                             | On                 |
| Load images to stamp segments                 | On                 |
| Load images to graphic segments               | Off                |
| Auto open inline display                      | Off                |
| Auto close inline display                     | On                 |
| Start measurement without further preparation | Off                |
| Wait for user to start                        | Off                |
| Start measurements                            | Single measurement |

**Routine**

|                    |                                                                  |
|--------------------|------------------------------------------------------------------|
| Slab group         | 1                                                                |
| Slabs              | 1                                                                |
| Dist. factor       | 50 %                                                             |
| Position           | Isocenter                                                        |
| Orientation        | Sagittal                                                         |
| Phase enc. dir.    | A >> P                                                           |
| AutoAlign          | Head > Brain                                                     |
| Phase oversampling | 50 %                                                             |
| Slice oversampling | 0.0 %                                                            |
| Slices per slab    | 320                                                              |
| FoV read           | 320 mm                                                           |
| FoV phase          | 100.0 %                                                          |
| Slice thickness    | 1.00 mm                                                          |
| TR                 | 1880.0 ms                                                        |
| TE                 | 2.63 ms                                                          |
| Averages           | 1                                                                |
| Concatenations     | 1                                                                |
| Filter             | Distortion Corr.(2D),<br>Prescan Normalize,<br>Elliptical filter |
| Coil elements      | BO1-3;SP3-5                                                      |

**Contrast - Common**

|                   |             |
|-------------------|-------------|
| TR                | 1880.0 ms   |
| TE                | 2.63 ms     |
| Magn. preparation | Non-sel. IR |
| T1                | 1030 ms     |
| Flip angle        | 12 deg      |
| Fat suppr.        | None        |
| Water suppr.      | None        |

**Contrast - Dynamic**

|                 |           |
|-----------------|-----------|
| Averages        | 1         |
| Averaging mode  | Long term |
| Reconstruction  | Magnitude |
| Measurements    | 1         |
| Multiple series | Off       |

**Resolution - Common**

|                       |         |
|-----------------------|---------|
| FoV read              | 320 mm  |
| FoV phase             | 100.0 % |
| Slice thickness       | 1.00 mm |
| Base resolution       | 320     |
| Phase resolution      | 100 %   |
| Slice resolution      | 80 %    |
| Phase partial Fourier | Off     |
| Slice partial Fourier | Off     |

**Resolution - Common**

|               |    |
|---------------|----|
| Interpolation | On |
|---------------|----|

**Resolution - iPAT**

|                     |            |
|---------------------|------------|
| PAT mode            | GRAPPA     |
| Accel. factor PE    | 2          |
| Ref. lines PE       | 45         |
| Accel. factor 3D    | 1          |
| Reference scan mode | Integrated |

**Resolution - Filter Image**

|                   |     |
|-------------------|-----|
| Image Filter      | Off |
| Distortion Corr.  | On  |
| Mode              | 2D  |
| Unfiltered images | Off |
| Prescan Normalize | On  |
| Unfiltered images | Off |
| Normalize         | Off |
| B1 filter         | Off |

**Resolution - Filter Rawdata**

|                   |     |
|-------------------|-----|
| Raw filter        | Off |
| Elliptical filter | On  |

**Geometry - Common**

|                    |             |
|--------------------|-------------|
| Slab group         | 1           |
| Slabs              | 1           |
| Dist. factor       | 50 %        |
| Position           | Isocenter   |
| Orientation        | Sagittal    |
| Phase enc. dir.    | A >> P      |
| Slice oversampling | 0.0 %       |
| Slices per slab    | 320         |
| FoV read           | 320 mm      |
| FoV phase          | 100.0 %     |
| Slice thickness    | 1.00 mm     |
| TR                 | 1880.0 ms   |
| Multi-slice mode   | Single shot |
| Series             | Ascending   |
| Concatenations     | 1           |

**Geometry - AutoAlign**

|                     |                |
|---------------------|----------------|
| Slab group          | 1              |
| Position            | Isocenter      |
| Orientation         | Sagittal       |
| Phase enc. dir.     | A >> P         |
| AutoAlign           | Head > Brain   |
| Initial Position    | L0.0 P0.0 H3.0 |
| L                   | 0.0 mm         |
| P                   | 0.0 mm         |
| H                   | 3.0 mm         |
| Initial Rotation    | -0.01 deg      |
| Initial Orientation | Sagittal       |

**Geometry - Navigator****Geometry - Tim Planning Suite**

|                   |      |
|-------------------|------|
| Set-n-Go Protocol | Off  |
| Table position    | H    |
| Table position    | 3 mm |
| Inline Composing  | Off  |

**System - Miscellaneous**

|                     |                  |
|---------------------|------------------|
| Positioning mode    | ISO              |
| Table position      | H                |
| Table position      | 3 mm             |
| MSMA                | S - C - T        |
| Sagittal            | R >> L           |
| Coronal             | A >> P           |
| Transversal         | F >> H           |
| Coil Combine Mode   | Adaptive Combine |
| Save uncombined     | Off              |
| Matrix Optimization | Off              |
| Coil Focus          | Flat             |
| AutoAlign           | Head > Brain     |
| Coil Select Mode    | Default          |

**System - Adjustments**

|                          |         |
|--------------------------|---------|
| B0 Shim mode             | Tune up |
| Adjust with body coil    | Off     |
| Confirm freq. adjustment | Off     |
| Assume Dominant Fat      | Off     |
| Assume Silicone          | Off     |
| Adjustment Tolerance     | Auto    |

**System - Adjust Volume**

|             |             |
|-------------|-------------|
| Position    | Isocenter   |
| Orientation | Transversal |
| Rotation    | 0.00 deg    |
| A >> P      | 263 mm      |
| R >> L      | 350 mm      |
| F >> H      | 350 mm      |
| Reset       | Off         |

**System - Tx/Rx**

|                     |               |
|---------------------|---------------|
| Frequency 1H        | 63.685812 MHz |
| Correction factor   | 1             |
| Gain                | Low           |
| Img. Scale Cor.     | 1.000         |
| Reset               | Off           |
| ? Ref. amplitude 1H | 0.000 V       |

**Physio - Signal1**

|                 |           |
|-----------------|-----------|
| 1st Signal/Mode | None      |
| TR              | 1880.0 ms |
| Concatenations  | 1         |

**Physio - Cardiac**

|                   |             |
|-------------------|-------------|
| Magn. preparation | Non-sel. IR |
| TI                | 1030 ms     |
| Fat suppr.        | None        |
| Dark blood        | Off         |
| FoV read          | 320 mm      |
| FoV phase         | 100.0 %     |
| Phase resolution  | 100 %       |

**Physio - PACE**

|                |     |
|----------------|-----|
| Resp. control  | Off |
| Concatenations | 1   |

**Inline - Common**

|                |     |
|----------------|-----|
| Subtract       | On  |
| Save images    | On  |
| Autoscaling    | Off |
| Scaling factor | 1   |
| Offset         | 0   |

**Inline - Common**

|                      |     |
|----------------------|-----|
| Subtrahend           | 1   |
| Subtraction group    | 1   |
| Measurements         | 1   |
| StdDev               | Off |
| Save original images | On  |

**Inline - MIP**

|                      |     |
|----------------------|-----|
| MIP-Sag              | Off |
| MIP-Cor              | Off |
| MIP-Tra              | Off |
| MIP-Time             | Off |
| Save original images | On  |

**Inline - Composing**

|                   |     |
|-------------------|-----|
| Inline Composing  | Off |
| Distortion Corr.  | On  |
| Mode              | 2D  |
| Unfiltered images | Off |

**Inline - MapIt**

|                      |           |
|----------------------|-----------|
| Save original images | On        |
| MapIt                | None      |
| Flip angle           | 12 deg    |
| Measurements         | 1         |
| TR                   | 1880.0 ms |
| TE                   | 2.63 ms   |

**Sequence - Part 1**

|                     |             |
|---------------------|-------------|
| Introduction        | On          |
| Dimension           | 3D          |
| Elliptical scanning | Off         |
| Reordering          | Linear      |
| Asymmetric echo     | Allowed     |
| Flow comp.          | No          |
| Multi-slice mode    | Single shot |
| Echo spacing        | 6.6 ms      |
| Bandwidth           | 200 Hz/Px   |

**Sequence - Part 2**

|                         |           |
|-------------------------|-----------|
| RF pulse type           | Fast      |
| Gradient mode           | Fast      |
| Excitation              | Slab-sel. |
| RF spoiling             | On        |
| Incr. Gradient spoiling | Off       |
| Turbo factor            | 256       |

**Sequence - Assistant**

|      |     |
|------|-----|
| Mode | Off |
|------|-----|

\\PHYSIK\E010\Gnirs\BPL\_Beekley\_Planeboard\_Session1\_normal\6\_20\_3PLANE\_T2

TA: 9:16 PM: FIX Voxel size: 0.4x0.4x4.0 mmPAT: 2 Rel. SNR: 1.00 : tseR

**Properties**

|                                               |                    |
|-----------------------------------------------|--------------------|
| Prio recon                                    | Off                |
| Load images to viewer                         | On                 |
| Inline movie                                  | Off                |
| Auto store images                             | On                 |
| Load images to stamp segments                 | On                 |
| Load images to graphic segments               | Off                |
| Auto open inline display                      | Off                |
| Auto close inline display                     | Off                |
| Start measurement without further preparation | Off                |
| Wait for user to start                        | Off                |
| Start measurements                            | Single measurement |

**Routine**

|                    |                                                                  |
|--------------------|------------------------------------------------------------------|
| Slice group        | 1                                                                |
| Slices             | 80                                                               |
| Dist. factor       | 0 %                                                              |
| Position           | Isocenter                                                        |
| Orientation        | Sagittal                                                         |
| Phase enc. dir.    | H >> F                                                           |
| AutoAlign          | Head > Brain                                                     |
| Phase oversampling | 0 %                                                              |
| FoV read           | 320 mm                                                           |
| FoV phase          | 100.0 %                                                          |
| Slice thickness    | 4.0 mm                                                           |
| TR                 | 6450.0 ms                                                        |
| TE                 | 107.0 ms                                                         |
| Averages           | 3                                                                |
| Concatenations     | 2                                                                |
| Filter             | Distortion Corr.(2D),<br>Prescan Normalize,<br>Elliptical filter |
| Coil elements      | BO1-3;SP3-5                                                      |

**Contrast - Common**

|                   |           |
|-------------------|-----------|
| TR                | 6450.0 ms |
| TE                | 107.0 ms  |
| TD                | 0.0 ms    |
| MTC               | Off       |
| Magn. preparation | None      |
| Flip angle        | 180 deg   |
| Fat suppr.        | None      |
| Water suppr.      | None      |
| Restore magn.     | On        |

**Contrast - Dynamic**

|                 |                  |
|-----------------|------------------|
| Averages        | 3                |
| Averaging mode  | Short term       |
| Reconstruction  | Magnitude        |
| Measurements    | 1                |
| Multiple series | Each measurement |

**Resolution - Common**

|                       |           |
|-----------------------|-----------|
| FoV read              | 320 mm    |
| FoV phase             | 100.0 %   |
| Slice thickness       | 4.0 mm    |
| Base resolution       | 448       |
| Phase resolution      | 90 %      |
| Phase partial Fourier | Off       |
| Trajectory            | Cartesian |
| Interpolation         | On        |

**Resolution - iPAT**

|                     |                  |
|---------------------|------------------|
| PAT mode            | GRAPPA           |
| Accel. factor PE    | 2                |
| Ref. lines PE       | 32               |
| Reference scan mode | Self-calibration |

**Resolution - Filter Image**

|                   |     |
|-------------------|-----|
| Image Filter      | Off |
| Distortion Corr.  | On  |
| Mode              | 2D  |
| Unfiltered images | Off |
| Prescan Normalize | On  |
| Unfiltered images | Off |
| Normalize         | Off |
| B1 filter         | Off |

**Resolution - Filter Rawdata**

|                   |     |
|-------------------|-----|
| Raw filter        | Off |
| Elliptical filter | On  |

**Geometry - Common**

|                  |             |
|------------------|-------------|
| Slice group      | 1           |
| Slices           | 80          |
| Dist. factor     | 0 %         |
| Position         | Isocenter   |
| Orientation      | Sagittal    |
| Phase enc. dir.  | H >> F      |
| FoV read         | 320 mm      |
| FoV phase        | 100.0 %     |
| Slice thickness  | 4.0 mm      |
| TR               | 6450.0 ms   |
| Multi-slice mode | Interleaved |
| Series           | Interleaved |
| Concatenations   | 2           |

**Geometry - AutoAlign**

|                     |              |
|---------------------|--------------|
| Slice group         | 1            |
| Position            | Isocenter    |
| Orientation         | Sagittal     |
| Phase enc. dir.     | H >> F       |
| AutoAlign           | Head > Brain |
| Initial Position    | Isocenter    |
| L                   | 0.0 mm       |
| P                   | 0.0 mm       |
| H                   | 0.0 mm       |
| Initial Rotation    | 89.99 deg    |
| Initial Orientation | Sagittal     |

**Geometry - Saturation**

|               |      |
|---------------|------|
| Fat suppr.    | None |
| Water suppr.  | None |
| Restore magn. | On   |
| Special sat.  | None |

**Geometry - Navigator****Geometry - Tim Planning Suite**

|                   |      |
|-------------------|------|
| Set-n-Go Protocol | Off  |
| Table position    | H    |
| Table position    | 3 mm |
| Inline Composing  | Off  |



**System - Miscellaneous**

|                     |                  |
|---------------------|------------------|
| Positioning mode    | FIX              |
| Table position      | H                |
| Table position      | 3 mm             |
| MSMA                | S - C - T        |
| Sagittal            | R >> L           |
| Coronal             | A >> P           |
| Transversal         | F >> H           |
| Coil Combine Mode   | Adaptive Combine |
| Save uncombined     | Off              |
| Matrix Optimization | Off              |
| Coil Focus          | Flat             |
| AutoAlign           | Head > Brain     |
| Coil Select Mode    | Default          |

**System - Adjustments**

|                          |         |
|--------------------------|---------|
| B0 Shim mode             | Tune up |
| Adjust with body coil    | Off     |
| Confirm freq. adjustment | Off     |
| Assume Dominant Fat      | Off     |
| Assume Silicone          | Off     |
| Adjustment Tolerance     | Auto    |

**System - Adjust Volume**

|             |             |
|-------------|-------------|
| Position    | Isocenter   |
| Orientation | Transversal |
| Rotation    | 0.00 deg    |
| A >> P      | 263 mm      |
| R >> L      | 350 mm      |
| F >> H      | 350 mm      |
| Reset       | Off         |

**System - Tx/Rx**

|                     |               |
|---------------------|---------------|
| Frequency 1H        | 63.685812 MHz |
| Correction factor   | 1             |
| Gain                | High          |
| Img. Scale Cor.     | 1.000         |
| Reset               | Off           |
| ? Ref. amplitude 1H | 0.000 V       |

**Physio - Signal1**

|                 |           |
|-----------------|-----------|
| 1st Signal/Mode | None      |
| TR              | 6450.0 ms |
| Concatenations  | 2         |

**Physio - Cardiac**

|                   |           |
|-------------------|-----------|
| Magn. preparation | None      |
| Fat suppr.        | None      |
| Dark blood        | Off       |
| FoV read          | 320 mm    |
| FoV phase         | 100.0 %   |
| Phase resolution  | 90 %      |
| Trajectory        | Cartesian |

**Physio - PACE**

|                |     |
|----------------|-----|
| Resp. control  | Off |
| Concatenations | 2   |

**Inline - Common**

|                      |     |
|----------------------|-----|
| Subtract             | Off |
| Measurements         | 1   |
| StdDev               | Off |
| Save original images | On  |

**Inline - MIP**

|                      |     |
|----------------------|-----|
| MIP-Sag              | Off |
| MIP-Cor              | Off |
| MIP-Tra              | Off |
| MIP-Time             | Off |
| Save original images | On  |

**Inline - Composing**

|                   |     |
|-------------------|-----|
| Inline Composing  | Off |
| Distortion Corr.  | On  |
| Mode              | 2D  |
| Unfiltered images | Off |

**Sequence - Part 1**

|                     |             |
|---------------------|-------------|
| Introduction        | On          |
| Dimension           | 2D          |
| Compensate T2 decay | Off         |
| Reduce Motion Sens. | On          |
| Contrasts           | 1           |
| Flow comp.          | No          |
| Multi-slice mode    | Interleaved |
| Free echo spacing   | Off         |
| Echo spacing        | 9.74 ms     |
| Bandwidth           | 199 Hz/Px   |

**Sequence - Part 2**

|                          |              |
|--------------------------|--------------|
| Define                   | Turbo factor |
| Echo trains per slice    | 14           |
| Phase correction         | Automatic    |
| Acoustic noise reduction | None         |
| RF pulse type            | Normal       |
| Gradient mode            | Normal       |
| WARP                     | Off          |
| Red. EC sensitivity      | Off          |
| Turbo factor             | 15           |

**Sequence - Assistant**

|               |      |
|---------------|------|
| Mode          | Off  |
| Allowed delay | 30 s |

\\PHYSIK\E010\Gnirs\BPL\_Beekeley\_Planeboard\_Session1\_normal\6\_20\_4PLANE\_T1

TA: 8:12 PM: ISO Voxel size: 0.5×0.5×1.0 mmPAT: 2 Rel. SNR: 1.00 : tfl

**Properties**

|                                               |                    |
|-----------------------------------------------|--------------------|
| Prio recon                                    | Off                |
| Load images to viewer                         | On                 |
| Inline movie                                  | Off                |
| Auto store images                             | On                 |
| Load images to stamp segments                 | On                 |
| Load images to graphic segments               | Off                |
| Auto open inline display                      | Off                |
| Auto close inline display                     | On                 |
| Start measurement without further preparation | Off                |
| Wait for user to start                        | Off                |
| Start measurements                            | Single measurement |

**Routine**

|                    |                                                                  |
|--------------------|------------------------------------------------------------------|
| Slab group         | 1                                                                |
| Slabs              | 1                                                                |
| Dist. factor       | 50 %                                                             |
| Position           | Isocenter                                                        |
| Orientation        | Sagittal                                                         |
| Phase enc. dir.    | A >> P                                                           |
| AutoAlign          | Head > Brain                                                     |
| Phase oversampling | 50 %                                                             |
| Slice oversampling | 0.0 %                                                            |
| Slices per slab    | 320                                                              |
| FoV read           | 320 mm                                                           |
| FoV phase          | 100.0 %                                                          |
| Slice thickness    | 1.00 mm                                                          |
| TR                 | 1880.0 ms                                                        |
| TE                 | 2.63 ms                                                          |
| Averages           | 1                                                                |
| Concatenations     | 1                                                                |
| Filter             | Distortion Corr.(2D),<br>Prescan Normalize,<br>Elliptical filter |
| Coil elements      | BO1-3;SP3-5                                                      |

**Contrast - Common**

|                   |             |
|-------------------|-------------|
| TR                | 1880.0 ms   |
| TE                | 2.63 ms     |
| Magn. preparation | Non-sel. IR |
| T1                | 1030 ms     |
| Flip angle        | 12 deg      |
| Fat suppr.        | None        |
| Water suppr.      | None        |

**Contrast - Dynamic**

|                 |           |
|-----------------|-----------|
| Averages        | 1         |
| Averaging mode  | Long term |
| Reconstruction  | Magnitude |
| Measurements    | 1         |
| Multiple series | Off       |

**Resolution - Common**

|                       |         |
|-----------------------|---------|
| FoV read              | 320 mm  |
| FoV phase             | 100.0 % |
| Slice thickness       | 1.00 mm |
| Base resolution       | 320     |
| Phase resolution      | 100 %   |
| Slice resolution      | 80 %    |
| Phase partial Fourier | Off     |
| Slice partial Fourier | Off     |

**Resolution - Common**

|               |    |
|---------------|----|
| Interpolation | On |
|---------------|----|

**Resolution - iPAT**

|                     |            |
|---------------------|------------|
| PAT mode            | GRAPPA     |
| Accel. factor PE    | 2          |
| Ref. lines PE       | 45         |
| Accel. factor 3D    | 1          |
| Reference scan mode | Integrated |

**Resolution - Filter Image**

|                   |     |
|-------------------|-----|
| Image Filter      | Off |
| Distortion Corr.  | On  |
| Mode              | 2D  |
| Unfiltered images | Off |
| Prescan Normalize | On  |
| Unfiltered images | Off |
| Normalize         | Off |
| B1 filter         | Off |

**Resolution - Filter Rawdata**

|                   |     |
|-------------------|-----|
| Raw filter        | Off |
| Elliptical filter | On  |

**Geometry - Common**

|                    |             |
|--------------------|-------------|
| Slab group         | 1           |
| Slabs              | 1           |
| Dist. factor       | 50 %        |
| Position           | Isocenter   |
| Orientation        | Sagittal    |
| Phase enc. dir.    | A >> P      |
| Slice oversampling | 0.0 %       |
| Slices per slab    | 320         |
| FoV read           | 320 mm      |
| FoV phase          | 100.0 %     |
| Slice thickness    | 1.00 mm     |
| TR                 | 1880.0 ms   |
| Multi-slice mode   | Single shot |
| Series             | Ascending   |
| Concatenations     | 1           |

**Geometry - AutoAlign**

|                     |                |
|---------------------|----------------|
| Slab group          | 1              |
| Position            | Isocenter      |
| Orientation         | Sagittal       |
| Phase enc. dir.     | A >> P         |
| AutoAlign           | Head > Brain   |
| Initial Position    | L0.0 P0.0 H3.0 |
| L                   | 0.0 mm         |
| P                   | 0.0 mm         |
| H                   | 3.0 mm         |
| Initial Rotation    | -0.01 deg      |
| Initial Orientation | Sagittal       |

**Geometry - Navigator****Geometry - Tim Planning Suite**

|                   |      |
|-------------------|------|
| Set-n-Go Protocol | Off  |
| Table position    | H    |
| Table position    | 3 mm |
| Inline Composing  | Off  |

**System - Miscellaneous**

|                     |                  |
|---------------------|------------------|
| Positioning mode    | ISO              |
| Table position      | H                |
| Table position      | 3 mm             |
| MSMA                | S - C - T        |
| Sagittal            | R >> L           |
| Coronal             | A >> P           |
| Transversal         | F >> H           |
| Coil Combine Mode   | Adaptive Combine |
| Save uncombined     | Off              |
| Matrix Optimization | Off              |
| Coil Focus          | Flat             |
| AutoAlign           | Head > Brain     |
| Coil Select Mode    | Default          |

**System - Adjustments**

|                          |         |
|--------------------------|---------|
| B0 Shim mode             | Tune up |
| Adjust with body coil    | Off     |
| Confirm freq. adjustment | Off     |
| Assume Dominant Fat      | Off     |
| Assume Silicone          | Off     |
| Adjustment Tolerance     | Auto    |

**System - Adjust Volume**

|             |             |
|-------------|-------------|
| Position    | Isocenter   |
| Orientation | Transversal |
| Rotation    | 0.00 deg    |
| A >> P      | 263 mm      |
| R >> L      | 350 mm      |
| F >> H      | 350 mm      |
| Reset       | Off         |

**System - Tx/Rx**

|                     |               |
|---------------------|---------------|
| Frequency 1H        | 63.685812 MHz |
| Correction factor   | 1             |
| Gain                | Low           |
| Img. Scale Cor.     | 1.000         |
| Reset               | Off           |
| ? Ref. amplitude 1H | 0.000 V       |

**Physio - Signal1**

|                 |           |
|-----------------|-----------|
| 1st Signal/Mode | None      |
| TR              | 1880.0 ms |
| Concatenations  | 1         |

**Physio - Cardiac**

|                   |             |
|-------------------|-------------|
| Magn. preparation | Non-sel. IR |
| TI                | 1030 ms     |
| Fat suppr.        | None        |
| Dark blood        | Off         |
| FoV read          | 320 mm      |
| FoV phase         | 100.0 %     |
| Phase resolution  | 100 %       |

**Physio - PACE**

|                |     |
|----------------|-----|
| Resp. control  | Off |
| Concatenations | 1   |

**Inline - Common**

|                |     |
|----------------|-----|
| Subtract       | On  |
| Save images    | On  |
| Autoscaling    | Off |
| Scaling factor | 1   |
| Offset         | 0   |

**Inline - Common**

|                      |     |
|----------------------|-----|
| Subtrahend           | 1   |
| Subtraction group    | 1   |
| Measurements         | 1   |
| StdDev               | Off |
| Save original images | On  |

**Inline - MIP**

|                      |     |
|----------------------|-----|
| MIP-Sag              | Off |
| MIP-Cor              | Off |
| MIP-Tra              | Off |
| MIP-Time             | Off |
| Save original images | On  |

**Inline - Composing**

|                   |     |
|-------------------|-----|
| Inline Composing  | Off |
| Distortion Corr.  | On  |
| Mode              | 2D  |
| Unfiltered images | Off |

**Inline - MapIt**

|                      |           |
|----------------------|-----------|
| Save original images | On        |
| MapIt                | None      |
| Flip angle           | 12 deg    |
| Measurements         | 1         |
| TR                   | 1880.0 ms |
| TE                   | 2.63 ms   |

**Sequence - Part 1**

|                     |             |
|---------------------|-------------|
| Introduction        | On          |
| Dimension           | 3D          |
| Elliptical scanning | Off         |
| Reordering          | Linear      |
| Asymmetric echo     | Allowed     |
| Flow comp.          | No          |
| Multi-slice mode    | Single shot |
| Echo spacing        | 6.6 ms      |
| Bandwidth           | 200 Hz/Px   |

**Sequence - Part 2**

|                         |           |
|-------------------------|-----------|
| RF pulse type           | Fast      |
| Gradient mode           | Fast      |
| Excitation              | Slab-sel. |
| RF spoiling             | On        |
| Incr. Gradient spoiling | Off       |
| Turbo factor            | 256       |

**Sequence - Assistant**

|      |     |
|------|-----|
| Mode | Off |
|------|-----|

\\PHYSIK\E010\Gnirs\BPL\_Beekley\_Planeboard\_Session1\_normal\6\_20\_4PLANE\_T2

TA: 9:16 PM: FIX Voxel size: 0.4x0.4x4.0 mmPAT: 2 Rel. SNR: 1.00 : tseR

**Properties**

|                                               |                    |
|-----------------------------------------------|--------------------|
| Prio recon                                    | Off                |
| Load images to viewer                         | On                 |
| Inline movie                                  | Off                |
| Auto store images                             | On                 |
| Load images to stamp segments                 | On                 |
| Load images to graphic segments               | Off                |
| Auto open inline display                      | Off                |
| Auto close inline display                     | Off                |
| Start measurement without further preparation | Off                |
| Wait for user to start                        | Off                |
| Start measurements                            | Single measurement |

**Routine**

|                    |                                                                  |
|--------------------|------------------------------------------------------------------|
| Slice group        | 1                                                                |
| Slices             | 80                                                               |
| Dist. factor       | 0 %                                                              |
| Position           | Isocenter                                                        |
| Orientation        | Sagittal                                                         |
| Phase enc. dir.    | H >> F                                                           |
| AutoAlign          | Head > Brain                                                     |
| Phase oversampling | 0 %                                                              |
| FoV read           | 320 mm                                                           |
| FoV phase          | 100.0 %                                                          |
| Slice thickness    | 4.0 mm                                                           |
| TR                 | 6450.0 ms                                                        |
| TE                 | 107.0 ms                                                         |
| Averages           | 3                                                                |
| Concatenations     | 2                                                                |
| Filter             | Distortion Corr.(2D),<br>Prescan Normalize,<br>Elliptical filter |
| Coil elements      | BO1-3;SP3-5                                                      |

**Contrast - Common**

|                   |           |
|-------------------|-----------|
| TR                | 6450.0 ms |
| TE                | 107.0 ms  |
| TD                | 0.0 ms    |
| MTC               | Off       |
| Magn. preparation | None      |
| Flip angle        | 180 deg   |
| Fat suppr.        | None      |
| Water suppr.      | None      |
| Restore magn.     | On        |

**Contrast - Dynamic**

|                 |                  |
|-----------------|------------------|
| Averages        | 3                |
| Averaging mode  | Short term       |
| Reconstruction  | Magnitude        |
| Measurements    | 1                |
| Multiple series | Each measurement |

**Resolution - Common**

|                       |           |
|-----------------------|-----------|
| FoV read              | 320 mm    |
| FoV phase             | 100.0 %   |
| Slice thickness       | 4.0 mm    |
| Base resolution       | 448       |
| Phase resolution      | 90 %      |
| Phase partial Fourier | Off       |
| Trajectory            | Cartesian |
| Interpolation         | On        |

**Resolution - iPAT**

|                     |                  |
|---------------------|------------------|
| PAT mode            | GRAPPA           |
| Accel. factor PE    | 2                |
| Ref. lines PE       | 32               |
| Reference scan mode | Self-calibration |

**Resolution - Filter Image**

|                   |     |
|-------------------|-----|
| Image Filter      | Off |
| Distortion Corr.  | On  |
| Mode              | 2D  |
| Unfiltered images | Off |
| Prescan Normalize | On  |
| Unfiltered images | Off |
| Normalize         | Off |
| B1 filter         | Off |

**Resolution - Filter Rawdata**

|                   |     |
|-------------------|-----|
| Raw filter        | Off |
| Elliptical filter | On  |

**Geometry - Common**

|                  |             |
|------------------|-------------|
| Slice group      | 1           |
| Slices           | 80          |
| Dist. factor     | 0 %         |
| Position         | Isocenter   |
| Orientation      | Sagittal    |
| Phase enc. dir.  | H >> F      |
| FoV read         | 320 mm      |
| FoV phase        | 100.0 %     |
| Slice thickness  | 4.0 mm      |
| TR               | 6450.0 ms   |
| Multi-slice mode | Interleaved |
| Series           | Interleaved |
| Concatenations   | 2           |

**Geometry - AutoAlign**

|                     |              |
|---------------------|--------------|
| Slice group         | 1            |
| Position            | Isocenter    |
| Orientation         | Sagittal     |
| Phase enc. dir.     | H >> F       |
| AutoAlign           | Head > Brain |
| Initial Position    | Isocenter    |
| L                   | 0.0 mm       |
| P                   | 0.0 mm       |
| H                   | 0.0 mm       |
| Initial Rotation    | 89.99 deg    |
| Initial Orientation | Sagittal     |

**Geometry - Saturation**

|               |      |
|---------------|------|
| Fat suppr.    | None |
| Water suppr.  | None |
| Restore magn. | On   |
| Special sat.  | None |

**Geometry - Navigator****Geometry - Tim Planning Suite**

|                   |      |
|-------------------|------|
| Set-n-Go Protocol | Off  |
| Table position    | H    |
| Table position    | 3 mm |
| Inline Composing  | Off  |

**System - Miscellaneous**

|                     |                  |
|---------------------|------------------|
| Positioning mode    | FIX              |
| Table position      | H                |
| Table position      | 3 mm             |
| MSMA                | S - C - T        |
| Sagittal            | R >> L           |
| Coronal             | A >> P           |
| Transversal         | F >> H           |
| Coil Combine Mode   | Adaptive Combine |
| Save uncombined     | Off              |
| Matrix Optimization | Off              |
| Coil Focus          | Flat             |
| AutoAlign           | Head > Brain     |
| Coil Select Mode    | Default          |

**System - Adjustments**

|                          |         |
|--------------------------|---------|
| B0 Shim mode             | Tune up |
| Adjust with body coil    | Off     |
| Confirm freq. adjustment | Off     |
| Assume Dominant Fat      | Off     |
| Assume Silicone          | Off     |
| Adjustment Tolerance     | Auto    |

**System - Adjust Volume**

|             |             |
|-------------|-------------|
| Position    | Isocenter   |
| Orientation | Transversal |
| Rotation    | 0.00 deg    |
| A >> P      | 263 mm      |
| R >> L      | 350 mm      |
| F >> H      | 350 mm      |
| Reset       | Off         |

**System - Tx/Rx**

|                     |               |
|---------------------|---------------|
| Frequency 1H        | 63.685812 MHz |
| Correction factor   | 1             |
| Gain                | High          |
| Img. Scale Cor.     | 1.000         |
| Reset               | Off           |
| ? Ref. amplitude 1H | 0.000 V       |

**Physio - Signal1**

|                 |           |
|-----------------|-----------|
| 1st Signal/Mode | None      |
| TR              | 6450.0 ms |
| Concatenations  | 2         |

**Physio - Cardiac**

|                   |           |
|-------------------|-----------|
| Magn. preparation | None      |
| Fat suppr.        | None      |
| Dark blood        | Off       |
| FoV read          | 320 mm    |
| FoV phase         | 100.0 %   |
| Phase resolution  | 90 %      |
| Trajectory        | Cartesian |

**Physio - PACE**

|                |     |
|----------------|-----|
| Resp. control  | Off |
| Concatenations | 2   |

**Inline - Common**

|                      |     |
|----------------------|-----|
| Subtract             | Off |
| Measurements         | 1   |
| StdDev               | Off |
| Save original images | On  |

**Inline - MIP**

|                      |     |
|----------------------|-----|
| MIP-Sag              | Off |
| MIP-Cor              | Off |
| MIP-Tra              | Off |
| MIP-Time             | Off |
| Save original images | On  |

**Inline - Composing**

|                   |     |
|-------------------|-----|
| Inline Composing  | Off |
| Distortion Corr.  | On  |
| Mode              | 2D  |
| Unfiltered images | Off |

**Sequence - Part 1**

|                     |             |
|---------------------|-------------|
| Introduction        | On          |
| Dimension           | 2D          |
| Compensate T2 decay | Off         |
| Reduce Motion Sens. | On          |
| Contrasts           | 1           |
| Flow comp.          | No          |
| Multi-slice mode    | Interleaved |
| Free echo spacing   | Off         |
| Echo spacing        | 9.74 ms     |
| Bandwidth           | 199 Hz/Px   |

**Sequence - Part 2**

|                          |              |
|--------------------------|--------------|
| Define                   | Turbo factor |
| Echo trains per slice    | 14           |
| Phase correction         | Automatic    |
| Acoustic noise reduction | None         |
| RF pulse type            | Normal       |
| Gradient mode            | Normal       |
| WARP                     | Off          |
| Red. EC sensitivity      | Off          |
| Turbo factor             | 15           |

**Sequence - Assistant**

|               |      |
|---------------|------|
| Mode          | Off  |
| Allowed delay | 30 s |

\\PHYSIK\E010\Gnirs\BPL\_Beekeley\_Planeboard\_Session1\_normal\6\_20\_5PLANE\_T1

TA: 8:12 PM: ISO Voxel size: 0.5×0.5×1.0 mmPAT: 2 Rel. SNR: 1.00 : tfl

**Properties**

|                                               |                    |
|-----------------------------------------------|--------------------|
| Prio recon                                    | Off                |
| Load images to viewer                         | On                 |
| Inline movie                                  | Off                |
| Auto store images                             | On                 |
| Load images to stamp segments                 | On                 |
| Load images to graphic segments               | Off                |
| Auto open inline display                      | Off                |
| Auto close inline display                     | On                 |
| Start measurement without further preparation | Off                |
| Wait for user to start                        | Off                |
| Start measurements                            | Single measurement |

**Routine**

|                    |                                                                  |
|--------------------|------------------------------------------------------------------|
| Slab group         | 1                                                                |
| Slabs              | 1                                                                |
| Dist. factor       | 50 %                                                             |
| Position           | Isocenter                                                        |
| Orientation        | Sagittal                                                         |
| Phase enc. dir.    | A >> P                                                           |
| AutoAlign          | Head > Brain                                                     |
| Phase oversampling | 50 %                                                             |
| Slice oversampling | 0.0 %                                                            |
| Slices per slab    | 320                                                              |
| FoV read           | 320 mm                                                           |
| FoV phase          | 100.0 %                                                          |
| Slice thickness    | 1.00 mm                                                          |
| TR                 | 1880.0 ms                                                        |
| TE                 | 2.63 ms                                                          |
| Averages           | 1                                                                |
| Concatenations     | 1                                                                |
| Filter             | Distortion Corr.(2D),<br>Prescan Normalize,<br>Elliptical filter |
| Coil elements      | BO1-3;SP3-5                                                      |

**Contrast - Common**

|                   |             |
|-------------------|-------------|
| TR                | 1880.0 ms   |
| TE                | 2.63 ms     |
| Magn. preparation | Non-sel. IR |
| T1                | 1030 ms     |
| Flip angle        | 12 deg      |
| Fat suppr.        | None        |
| Water suppr.      | None        |

**Contrast - Dynamic**

|                 |           |
|-----------------|-----------|
| Averages        | 1         |
| Averaging mode  | Long term |
| Reconstruction  | Magnitude |
| Measurements    | 1         |
| Multiple series | Off       |

**Resolution - Common**

|                       |         |
|-----------------------|---------|
| FoV read              | 320 mm  |
| FoV phase             | 100.0 % |
| Slice thickness       | 1.00 mm |
| Base resolution       | 320     |
| Phase resolution      | 100 %   |
| Slice resolution      | 80 %    |
| Phase partial Fourier | Off     |
| Slice partial Fourier | Off     |

**Resolution - Common**

|               |    |
|---------------|----|
| Interpolation | On |
|---------------|----|

**Resolution - iPAT**

|                     |            |
|---------------------|------------|
| PAT mode            | GRAPPA     |
| Accel. factor PE    | 2          |
| Ref. lines PE       | 45         |
| Accel. factor 3D    | 1          |
| Reference scan mode | Integrated |

**Resolution - Filter Image**

|                   |     |
|-------------------|-----|
| Image Filter      | Off |
| Distortion Corr.  | On  |
| Mode              | 2D  |
| Unfiltered images | Off |
| Prescan Normalize | On  |
| Unfiltered images | Off |
| Normalize         | Off |
| B1 filter         | Off |

**Resolution - Filter Rawdata**

|                   |     |
|-------------------|-----|
| Raw filter        | Off |
| Elliptical filter | On  |

**Geometry - Common**

|                    |             |
|--------------------|-------------|
| Slab group         | 1           |
| Slabs              | 1           |
| Dist. factor       | 50 %        |
| Position           | Isocenter   |
| Orientation        | Sagittal    |
| Phase enc. dir.    | A >> P      |
| Slice oversampling | 0.0 %       |
| Slices per slab    | 320         |
| FoV read           | 320 mm      |
| FoV phase          | 100.0 %     |
| Slice thickness    | 1.00 mm     |
| TR                 | 1880.0 ms   |
| Multi-slice mode   | Single shot |
| Series             | Ascending   |
| Concatenations     | 1           |

**Geometry - AutoAlign**

|                     |                |
|---------------------|----------------|
| Slab group          | 1              |
| Position            | Isocenter      |
| Orientation         | Sagittal       |
| Phase enc. dir.     | A >> P         |
| AutoAlign           | Head > Brain   |
| Initial Position    | L0.0 P0.0 H3.0 |
| L                   | 0.0 mm         |
| P                   | 0.0 mm         |
| H                   | 3.0 mm         |
| Initial Rotation    | -0.01 deg      |
| Initial Orientation | Sagittal       |

**Geometry - Navigator****Geometry - Tim Planning Suite**

|                   |      |
|-------------------|------|
| Set-n-Go Protocol | Off  |
| Table position    | H    |
| Table position    | 3 mm |
| Inline Composing  | Off  |

**System - Miscellaneous**

|                     |                  |
|---------------------|------------------|
| Positioning mode    | ISO              |
| Table position      | H                |
| Table position      | 3 mm             |
| MSMA                | S - C - T        |
| Sagittal            | R >> L           |
| Coronal             | A >> P           |
| Transversal         | F >> H           |
| Coil Combine Mode   | Adaptive Combine |
| Save uncombined     | Off              |
| Matrix Optimization | Off              |
| Coil Focus          | Flat             |
| AutoAlign           | Head > Brain     |
| Coil Select Mode    | Default          |

**System - Adjustments**

|                          |         |
|--------------------------|---------|
| B0 Shim mode             | Tune up |
| Adjust with body coil    | Off     |
| Confirm freq. adjustment | Off     |
| Assume Dominant Fat      | Off     |
| Assume Silicone          | Off     |
| Adjustment Tolerance     | Auto    |

**System - Adjust Volume**

|             |             |
|-------------|-------------|
| Position    | Isocenter   |
| Orientation | Transversal |
| Rotation    | 0.00 deg    |
| A >> P      | 263 mm      |
| R >> L      | 350 mm      |
| F >> H      | 350 mm      |
| Reset       | Off         |

**System - Tx/Rx**

|                     |               |
|---------------------|---------------|
| Frequency 1H        | 63.685812 MHz |
| Correction factor   | 1             |
| Gain                | Low           |
| Img. Scale Cor.     | 1.000         |
| Reset               | Off           |
| ? Ref. amplitude 1H | 0.000 V       |

**Physio - Signal1**

|                 |           |
|-----------------|-----------|
| 1st Signal/Mode | None      |
| TR              | 1880.0 ms |
| Concatenations  | 1         |

**Physio - Cardiac**

|                   |             |
|-------------------|-------------|
| Magn. preparation | Non-sel. IR |
| TI                | 1030 ms     |
| Fat suppr.        | None        |
| Dark blood        | Off         |
| FoV read          | 320 mm      |
| FoV phase         | 100.0 %     |
| Phase resolution  | 100 %       |

**Physio - PACE**

|                |     |
|----------------|-----|
| Resp. control  | Off |
| Concatenations | 1   |

**Inline - Common**

|                |     |
|----------------|-----|
| Subtract       | On  |
| Save images    | On  |
| Autoscaling    | Off |
| Scaling factor | 1   |
| Offset         | 0   |

**Inline - Common**

|                      |     |
|----------------------|-----|
| Subtrahend           | 1   |
| Subtraction group    | 1   |
| Measurements         | 1   |
| StdDev               | Off |
| Save original images | On  |

**Inline - MIP**

|                      |     |
|----------------------|-----|
| MIP-Sag              | Off |
| MIP-Cor              | Off |
| MIP-Tra              | Off |
| MIP-Time             | Off |
| Save original images | On  |

**Inline - Composing**

|                   |     |
|-------------------|-----|
| Inline Composing  | Off |
| Distortion Corr.  | On  |
| Mode              | 2D  |
| Unfiltered images | Off |

**Inline - MapIt**

|                      |           |
|----------------------|-----------|
| Save original images | On        |
| MapIt                | None      |
| Flip angle           | 12 deg    |
| Measurements         | 1         |
| TR                   | 1880.0 ms |
| TE                   | 2.63 ms   |

**Sequence - Part 1**

|                     |             |
|---------------------|-------------|
| Introduction        | On          |
| Dimension           | 3D          |
| Elliptical scanning | Off         |
| Reordering          | Linear      |
| Asymmetric echo     | Allowed     |
| Flow comp.          | No          |
| Multi-slice mode    | Single shot |
| Echo spacing        | 6.6 ms      |
| Bandwidth           | 200 Hz/Px   |

**Sequence - Part 2**

|                         |           |
|-------------------------|-----------|
| RF pulse type           | Fast      |
| Gradient mode           | Fast      |
| Excitation              | Slab-sel. |
| RF spoiling             | On        |
| Incr. Gradient spoiling | Off       |
| Turbo factor            | 256       |

**Sequence - Assistant**

|      |     |
|------|-----|
| Mode | Off |
|------|-----|

\\PHYSIK\E010\Gnirs\BPL\_Beekley\_Planeboard\_Session1\_normal\6\_20\_5PLANE\_T2

TA: 9:16 PM: FIX Voxel size: 0.4x0.4x4.0 mmPAT: 2 Rel. SNR: 1.00 : tseR

**Properties**

|                                               |                    |
|-----------------------------------------------|--------------------|
| Prio recon                                    | Off                |
| Load images to viewer                         | On                 |
| Inline movie                                  | Off                |
| Auto store images                             | On                 |
| Load images to stamp segments                 | On                 |
| Load images to graphic segments               | Off                |
| Auto open inline display                      | Off                |
| Auto close inline display                     | Off                |
| Start measurement without further preparation | Off                |
| Wait for user to start                        | Off                |
| Start measurements                            | Single measurement |

**Routine**

|                    |                                                                  |
|--------------------|------------------------------------------------------------------|
| Slice group        | 1                                                                |
| Slices             | 80                                                               |
| Dist. factor       | 0 %                                                              |
| Position           | Isocenter                                                        |
| Orientation        | Sagittal                                                         |
| Phase enc. dir.    | H >> F                                                           |
| AutoAlign          | Head > Brain                                                     |
| Phase oversampling | 0 %                                                              |
| FoV read           | 320 mm                                                           |
| FoV phase          | 100.0 %                                                          |
| Slice thickness    | 4.0 mm                                                           |
| TR                 | 6450.0 ms                                                        |
| TE                 | 107.0 ms                                                         |
| Averages           | 3                                                                |
| Concatenations     | 2                                                                |
| Filter             | Distortion Corr.(2D),<br>Prescan Normalize,<br>Elliptical filter |
| Coil elements      | BO1-3;SP3-5                                                      |

**Contrast - Common**

|                   |           |
|-------------------|-----------|
| TR                | 6450.0 ms |
| TE                | 107.0 ms  |
| TD                | 0.0 ms    |
| MTC               | Off       |
| Magn. preparation | None      |
| Flip angle        | 180 deg   |
| Fat suppr.        | None      |
| Water suppr.      | None      |
| Restore magn.     | On        |

**Contrast - Dynamic**

|                 |                  |
|-----------------|------------------|
| Averages        | 3                |
| Averaging mode  | Short term       |
| Reconstruction  | Magnitude        |
| Measurements    | 1                |
| Multiple series | Each measurement |

**Resolution - Common**

|                       |           |
|-----------------------|-----------|
| FoV read              | 320 mm    |
| FoV phase             | 100.0 %   |
| Slice thickness       | 4.0 mm    |
| Base resolution       | 448       |
| Phase resolution      | 90 %      |
| Phase partial Fourier | Off       |
| Trajectory            | Cartesian |
| Interpolation         | On        |

**Resolution - iPAT**

|                     |                  |
|---------------------|------------------|
| PAT mode            | GRAPPA           |
| Accel. factor PE    | 2                |
| Ref. lines PE       | 32               |
| Reference scan mode | Self-calibration |

**Resolution - Filter Image**

|                   |     |
|-------------------|-----|
| Image Filter      | Off |
| Distortion Corr.  | On  |
| Mode              | 2D  |
| Unfiltered images | Off |
| Prescan Normalize | On  |
| Unfiltered images | Off |
| Normalize         | Off |
| B1 filter         | Off |

**Resolution - Filter Rawdata**

|                   |     |
|-------------------|-----|
| Raw filter        | Off |
| Elliptical filter | On  |

**Geometry - Common**

|                  |             |
|------------------|-------------|
| Slice group      | 1           |
| Slices           | 80          |
| Dist. factor     | 0 %         |
| Position         | Isocenter   |
| Orientation      | Sagittal    |
| Phase enc. dir.  | H >> F      |
| FoV read         | 320 mm      |
| FoV phase        | 100.0 %     |
| Slice thickness  | 4.0 mm      |
| TR               | 6450.0 ms   |
| Multi-slice mode | Interleaved |
| Series           | Interleaved |
| Concatenations   | 2           |

**Geometry - AutoAlign**

|                     |              |
|---------------------|--------------|
| Slice group         | 1            |
| Position            | Isocenter    |
| Orientation         | Sagittal     |
| Phase enc. dir.     | H >> F       |
| AutoAlign           | Head > Brain |
| Initial Position    | Isocenter    |
| L                   | 0.0 mm       |
| P                   | 0.0 mm       |
| H                   | 0.0 mm       |
| Initial Rotation    | 89.99 deg    |
| Initial Orientation | Sagittal     |

**Geometry - Saturation**

|               |      |
|---------------|------|
| Fat suppr.    | None |
| Water suppr.  | None |
| Restore magn. | On   |
| Special sat.  | None |

**Geometry - Navigator****Geometry - Tim Planning Suite**

|                   |      |
|-------------------|------|
| Set-n-Go Protocol | Off  |
| Table position    | H    |
| Table position    | 3 mm |
| Inline Composing  | Off  |



**System - Miscellaneous**

|                     |                  |
|---------------------|------------------|
| Positioning mode    | FIX              |
| Table position      | H                |
| Table position      | 3 mm             |
| MSMA                | S - C - T        |
| Sagittal            | R >> L           |
| Coronal             | A >> P           |
| Transversal         | F >> H           |
| Coil Combine Mode   | Adaptive Combine |
| Save uncombined     | Off              |
| Matrix Optimization | Off              |
| Coil Focus          | Flat             |
| AutoAlign           | Head > Brain     |
| Coil Select Mode    | Default          |

**System - Adjustments**

|                          |         |
|--------------------------|---------|
| B0 Shim mode             | Tune up |
| Adjust with body coil    | Off     |
| Confirm freq. adjustment | Off     |
| Assume Dominant Fat      | Off     |
| Assume Silicone          | Off     |
| Adjustment Tolerance     | Auto    |

**System - Adjust Volume**

|             |             |
|-------------|-------------|
| Position    | Isocenter   |
| Orientation | Transversal |
| Rotation    | 0.00 deg    |
| A >> P      | 263 mm      |
| R >> L      | 350 mm      |
| F >> H      | 350 mm      |
| Reset       | Off         |

**System - Tx/Rx**

|                     |               |
|---------------------|---------------|
| Frequency 1H        | 63.685812 MHz |
| Correction factor   | 1             |
| Gain                | High          |
| Img. Scale Cor.     | 1.000         |
| Reset               | Off           |
| ? Ref. amplitude 1H | 0.000 V       |

**Physio - Signal1**

|                 |           |
|-----------------|-----------|
| 1st Signal/Mode | None      |
| TR              | 6450.0 ms |
| Concatenations  | 2         |

**Physio - Cardiac**

|                   |           |
|-------------------|-----------|
| Magn. preparation | None      |
| Fat suppr.        | None      |
| Dark blood        | Off       |
| FoV read          | 320 mm    |
| FoV phase         | 100.0 %   |
| Phase resolution  | 90 %      |
| Trajectory        | Cartesian |

**Physio - PACE**

|                |     |
|----------------|-----|
| Resp. control  | Off |
| Concatenations | 2   |

**Inline - Common**

|                      |     |
|----------------------|-----|
| Subtract             | Off |
| Measurements         | 1   |
| StdDev               | Off |
| Save original images | On  |

**Inline - MIP**

|                      |     |
|----------------------|-----|
| MIP-Sag              | Off |
| MIP-Cor              | Off |
| MIP-Tra              | Off |
| MIP-Time             | Off |
| Save original images | On  |

**Inline - Composing**

|                   |     |
|-------------------|-----|
| Inline Composing  | Off |
| Distortion Corr.  | On  |
| Mode              | 2D  |
| Unfiltered images | Off |

**Sequence - Part 1**

|                     |             |
|---------------------|-------------|
| Introduction        | On          |
| Dimension           | 2D          |
| Compensate T2 decay | Off         |
| Reduce Motion Sens. | On          |
| Contrasts           | 1           |
| Flow comp.          | No          |
| Multi-slice mode    | Interleaved |
| Free echo spacing   | Off         |
| Echo spacing        | 9.74 ms     |
| Bandwidth           | 199 Hz/Px   |

**Sequence - Part 2**

|                          |              |
|--------------------------|--------------|
| Define                   | Turbo factor |
| Echo trains per slice    | 14           |
| Phase correction         | Automatic    |
| Acoustic noise reduction | None         |
| RF pulse type            | Normal       |
| Gradient mode            | Normal       |
| WARP                     | Off          |
| Red. EC sensitivity      | Off          |
| Turbo factor             | 15           |

**Sequence - Assistant**

|               |      |
|---------------|------|
| Mode          | Off  |
| Allowed delay | 30 s |

\\PHYSIK\E010\Gnirs\BPL\_Beekeley\_Planeboard\_Session1\_normal\6\_20\_6PLANE\_T1

TA: 8:12 PM: ISO Voxel size: 1.0×1.0×1.0 mmPAT: 2 Rel. SNR: 1.00 : tfl

**Properties**

|                                               |                    |
|-----------------------------------------------|--------------------|
| Prio recon                                    | Off                |
| Load images to viewer                         | On                 |
| Inline movie                                  | Off                |
| Auto store images                             | On                 |
| Load images to stamp segments                 | On                 |
| Load images to graphic segments               | Off                |
| Auto open inline display                      | Off                |
| Auto close inline display                     | On                 |
| Start measurement without further preparation | Off                |
| Wait for user to start                        | Off                |
| Start measurements                            | Single measurement |

**Routine**

|                    |                                                                  |
|--------------------|------------------------------------------------------------------|
| Slab group         | 1                                                                |
| Slabs              | 1                                                                |
| Dist. factor       | 50 %                                                             |
| Position           | Isocenter                                                        |
| Orientation        | Sagittal                                                         |
| Phase enc. dir.    | A >> P                                                           |
| AutoAlign          | Head > Brain                                                     |
| Phase oversampling | 50 %                                                             |
| Slice oversampling | 0.0 %                                                            |
| Slices per slab    | 320                                                              |
| FoV read           | 320 mm                                                           |
| FoV phase          | 100.0 %                                                          |
| Slice thickness    | 1.00 mm                                                          |
| TR                 | 1880.0 ms                                                        |
| TE                 | 2.63 ms                                                          |
| Averages           | 1                                                                |
| Concatenations     | 1                                                                |
| Filter             | Distortion Corr.(2D),<br>Prescan Normalize,<br>Elliptical filter |
| Coil elements      | BO1-3;SP3-5                                                      |

**Contrast - Common**

|                   |             |
|-------------------|-------------|
| TR                | 1880.0 ms   |
| TE                | 2.63 ms     |
| Magn. preparation | Non-sel. IR |
| T1                | 1030 ms     |
| Flip angle        | 12 deg      |
| Fat suppr.        | None        |
| Water suppr.      | None        |

**Contrast - Dynamic**

|                 |           |
|-----------------|-----------|
| Averages        | 1         |
| Averaging mode  | Long term |
| Reconstruction  | Magnitude |
| Measurements    | 1         |
| Multiple series | Off       |

**Resolution - Common**

|                       |         |
|-----------------------|---------|
| FoV read              | 320 mm  |
| FoV phase             | 100.0 % |
| Slice thickness       | 1.00 mm |
| Base resolution       | 320     |
| Phase resolution      | 100 %   |
| Slice resolution      | 80 %    |
| Phase partial Fourier | Off     |
| Slice partial Fourier | Off     |

**Resolution - Common**

|               |     |
|---------------|-----|
| Interpolation | Off |
|---------------|-----|

**Resolution - iPAT**

|                     |            |
|---------------------|------------|
| PAT mode            | GRAPPA     |
| Accel. factor PE    | 2          |
| Ref. lines PE       | 45         |
| Accel. factor 3D    | 1          |
| Reference scan mode | Integrated |

**Resolution - Filter Image**

|                   |     |
|-------------------|-----|
| Image Filter      | Off |
| Distortion Corr.  | On  |
| Mode              | 2D  |
| Unfiltered images | Off |
| Prescan Normalize | On  |
| Unfiltered images | Off |
| Normalize         | Off |
| B1 filter         | Off |

**Resolution - Filter Rawdata**

|                   |     |
|-------------------|-----|
| Raw filter        | Off |
| Elliptical filter | On  |

**Geometry - Common**

|                    |             |
|--------------------|-------------|
| Slab group         | 1           |
| Slabs              | 1           |
| Dist. factor       | 50 %        |
| Position           | Isocenter   |
| Orientation        | Sagittal    |
| Phase enc. dir.    | A >> P      |
| Slice oversampling | 0.0 %       |
| Slices per slab    | 320         |
| FoV read           | 320 mm      |
| FoV phase          | 100.0 %     |
| Slice thickness    | 1.00 mm     |
| TR                 | 1880.0 ms   |
| Multi-slice mode   | Single shot |
| Series             | Ascending   |
| Concatenations     | 1           |

**Geometry - AutoAlign**

|                     |                |
|---------------------|----------------|
| Slab group          | 1              |
| Position            | Isocenter      |
| Orientation         | Sagittal       |
| Phase enc. dir.     | A >> P         |
| AutoAlign           | Head > Brain   |
| Initial Position    | L0.0 P0.0 H3.0 |
| L                   | 0.0 mm         |
| P                   | 0.0 mm         |
| H                   | 3.0 mm         |
| Initial Rotation    | -0.01 deg      |
| Initial Orientation | Sagittal       |

**Geometry - Navigator****Geometry - Tim Planning Suite**

|                   |      |
|-------------------|------|
| Set-n-Go Protocol | Off  |
| Table position    | H    |
| Table position    | 3 mm |
| Inline Composing  | Off  |

**System - Miscellaneous**

|                     |                  |
|---------------------|------------------|
| Positioning mode    | ISO              |
| Table position      | H                |
| Table position      | 3 mm             |
| MSMA                | S - C - T        |
| Sagittal            | R >> L           |
| Coronal             | A >> P           |
| Transversal         | F >> H           |
| Coil Combine Mode   | Adaptive Combine |
| Save uncombined     | Off              |
| Matrix Optimization | Off              |
| Coil Focus          | Flat             |
| AutoAlign           | Head > Brain     |
| Coil Select Mode    | Default          |

**System - Adjustments**

|                          |         |
|--------------------------|---------|
| B0 Shim mode             | Tune up |
| Adjust with body coil    | Off     |
| Confirm freq. adjustment | Off     |
| Assume Dominant Fat      | Off     |
| Assume Silicone          | Off     |
| Adjustment Tolerance     | Auto    |

**System - Adjust Volume**

|             |             |
|-------------|-------------|
| Position    | Isocenter   |
| Orientation | Transversal |
| Rotation    | 0.00 deg    |
| A >> P      | 263 mm      |
| R >> L      | 350 mm      |
| F >> H      | 350 mm      |
| Reset       | Off         |

**System - Tx/Rx**

|                     |               |
|---------------------|---------------|
| Frequency 1H        | 63.685812 MHz |
| Correction factor   | 1             |
| Gain                | Low           |
| Img. Scale Cor.     | 1.000         |
| Reset               | Off           |
| ? Ref. amplitude 1H | 0.000 V       |

**Physio - Signal1**

|                 |           |
|-----------------|-----------|
| 1st Signal/Mode | None      |
| TR              | 1880.0 ms |
| Concatenations  | 1         |

**Physio - Cardiac**

|                   |             |
|-------------------|-------------|
| Magn. preparation | Non-sel. IR |
| TI                | 1030 ms     |
| Fat suppr.        | None        |
| Dark blood        | Off         |
| FoV read          | 320 mm      |
| FoV phase         | 100.0 %     |
| Phase resolution  | 100 %       |

**Physio - PACE**

|                |     |
|----------------|-----|
| Resp. control  | Off |
| Concatenations | 1   |

**Inline - Common**

|                |     |
|----------------|-----|
| Subtract       | On  |
| Save images    | On  |
| Autoscaling    | Off |
| Scaling factor | 1   |
| Offset         | 0   |

**Inline - Common**

|                      |     |
|----------------------|-----|
| Subtrahend           | 1   |
| Subtraction group    | 1   |
| Measurements         | 1   |
| StdDev               | Off |
| Save original images | On  |

**Inline - MIP**

|                      |     |
|----------------------|-----|
| MIP-Sag              | Off |
| MIP-Cor              | Off |
| MIP-Tra              | Off |
| MIP-Time             | Off |
| Save original images | On  |

**Inline - Composing**

|                   |     |
|-------------------|-----|
| Inline Composing  | Off |
| Distortion Corr.  | On  |
| Mode              | 2D  |
| Unfiltered images | Off |

**Inline - MapIt**

|                      |           |
|----------------------|-----------|
| Save original images | On        |
| MapIt                | None      |
| Flip angle           | 12 deg    |
| Measurements         | 1         |
| TR                   | 1880.0 ms |
| TE                   | 2.63 ms   |

**Sequence - Part 1**

|                     |             |
|---------------------|-------------|
| Introduction        | On          |
| Dimension           | 3D          |
| Elliptical scanning | Off         |
| Reordering          | Linear      |
| Asymmetric echo     | Allowed     |
| Flow comp.          | No          |
| Multi-slice mode    | Single shot |
| Echo spacing        | 6.6 ms      |
| Bandwidth           | 200 Hz/Px   |

**Sequence - Part 2**

|                         |           |
|-------------------------|-----------|
| RF pulse type           | Fast      |
| Gradient mode           | Fast      |
| Excitation              | Slab-sel. |
| RF spoiling             | On        |
| Incr. Gradient spoiling | Off       |
| Turbo factor            | 256       |

**Sequence - Assistant**

|      |     |
|------|-----|
| Mode | Off |
|------|-----|

\\PHYSIK\E010\Gnirs\BPL\_Beekley\_Planeboard\_Session1\_normal\6\_20\_6PLANE\_T2

TA: 9:16 PM: FIX Voxel size: 0.4x0.4x4.0 mmPAT: 2 Rel. SNR: 1.00 : tseR

**Properties**

|                                               |                    |
|-----------------------------------------------|--------------------|
| Prio recon                                    | Off                |
| Load images to viewer                         | On                 |
| Inline movie                                  | Off                |
| Auto store images                             | On                 |
| Load images to stamp segments                 | On                 |
| Load images to graphic segments               | Off                |
| Auto open inline display                      | Off                |
| Auto close inline display                     | Off                |
| Start measurement without further preparation | Off                |
| Wait for user to start                        | Off                |
| Start measurements                            | Single measurement |

**Routine**

|                    |                                                                  |
|--------------------|------------------------------------------------------------------|
| Slice group        | 1                                                                |
| Slices             | 80                                                               |
| Dist. factor       | 0 %                                                              |
| Position           | Isocenter                                                        |
| Orientation        | Sagittal                                                         |
| Phase enc. dir.    | H >> F                                                           |
| AutoAlign          | Head > Brain                                                     |
| Phase oversampling | 0 %                                                              |
| FoV read           | 320 mm                                                           |
| FoV phase          | 100.0 %                                                          |
| Slice thickness    | 4.0 mm                                                           |
| TR                 | 6450.0 ms                                                        |
| TE                 | 107.0 ms                                                         |
| Averages           | 3                                                                |
| Concatenations     | 2                                                                |
| Filter             | Distortion Corr.(2D),<br>Prescan Normalize,<br>Elliptical filter |
| Coil elements      | BO1-3;SP3-5                                                      |

**Contrast - Common**

|                   |           |
|-------------------|-----------|
| TR                | 6450.0 ms |
| TE                | 107.0 ms  |
| TD                | 0.0 ms    |
| MTC               | Off       |
| Magn. preparation | None      |
| Flip angle        | 180 deg   |
| Fat suppr.        | None      |
| Water suppr.      | None      |
| Restore magn.     | On        |

**Contrast - Dynamic**

|                 |                  |
|-----------------|------------------|
| Averages        | 3                |
| Averaging mode  | Short term       |
| Reconstruction  | Magnitude        |
| Measurements    | 1                |
| Multiple series | Each measurement |

**Resolution - Common**

|                       |           |
|-----------------------|-----------|
| FoV read              | 320 mm    |
| FoV phase             | 100.0 %   |
| Slice thickness       | 4.0 mm    |
| Base resolution       | 448       |
| Phase resolution      | 90 %      |
| Phase partial Fourier | Off       |
| Trajectory            | Cartesian |
| Interpolation         | On        |

**Resolution - iPAT**

|                     |                  |
|---------------------|------------------|
| PAT mode            | GRAPPA           |
| Accel. factor PE    | 2                |
| Ref. lines PE       | 32               |
| Reference scan mode | Self-calibration |

**Resolution - Filter Image**

|                   |     |
|-------------------|-----|
| Image Filter      | Off |
| Distortion Corr.  | On  |
| Mode              | 2D  |
| Unfiltered images | Off |
| Prescan Normalize | On  |
| Unfiltered images | Off |
| Normalize         | Off |
| B1 filter         | Off |

**Resolution - Filter Rawdata**

|                   |     |
|-------------------|-----|
| Raw filter        | Off |
| Elliptical filter | On  |

**Geometry - Common**

|                  |             |
|------------------|-------------|
| Slice group      | 1           |
| Slices           | 80          |
| Dist. factor     | 0 %         |
| Position         | Isocenter   |
| Orientation      | Sagittal    |
| Phase enc. dir.  | H >> F      |
| FoV read         | 320 mm      |
| FoV phase        | 100.0 %     |
| Slice thickness  | 4.0 mm      |
| TR               | 6450.0 ms   |
| Multi-slice mode | Interleaved |
| Series           | Interleaved |
| Concatenations   | 2           |

**Geometry - AutoAlign**

|                     |              |
|---------------------|--------------|
| Slice group         | 1            |
| Position            | Isocenter    |
| Orientation         | Sagittal     |
| Phase enc. dir.     | H >> F       |
| AutoAlign           | Head > Brain |
| Initial Position    | Isocenter    |
| L                   | 0.0 mm       |
| P                   | 0.0 mm       |
| H                   | 0.0 mm       |
| Initial Rotation    | 89.99 deg    |
| Initial Orientation | Sagittal     |

**Geometry - Saturation**

|               |      |
|---------------|------|
| Fat suppr.    | None |
| Water suppr.  | None |
| Restore magn. | On   |
| Special sat.  | None |

**Geometry - Navigator****Geometry - Tim Planning Suite**

|                   |      |
|-------------------|------|
| Set-n-Go Protocol | Off  |
| Table position    | H    |
| Table position    | 3 mm |
| Inline Composing  | Off  |

**System - Miscellaneous**

|                     |                  |
|---------------------|------------------|
| Positioning mode    | FIX              |
| Table position      | H                |
| Table position      | 3 mm             |
| MSMA                | S - C - T        |
| Sagittal            | R >> L           |
| Coronal             | A >> P           |
| Transversal         | F >> H           |
| Coil Combine Mode   | Adaptive Combine |
| Save uncombined     | Off              |
| Matrix Optimization | Off              |
| Coil Focus          | Flat             |
| AutoAlign           | Head > Brain     |
| Coil Select Mode    | Default          |

**System - Adjustments**

|                          |         |
|--------------------------|---------|
| B0 Shim mode             | Tune up |
| Adjust with body coil    | Off     |
| Confirm freq. adjustment | Off     |
| Assume Dominant Fat      | Off     |
| Assume Silicone          | Off     |
| Adjustment Tolerance     | Auto    |

**System - Adjust Volume**

|             |             |
|-------------|-------------|
| Position    | Isocenter   |
| Orientation | Transversal |
| Rotation    | 0.00 deg    |
| A >> P      | 263 mm      |
| R >> L      | 350 mm      |
| F >> H      | 350 mm      |
| Reset       | Off         |

**System - Tx/Rx**

|                     |               |
|---------------------|---------------|
| Frequency 1H        | 63.685812 MHz |
| Correction factor   | 1             |
| Gain                | High          |
| Img. Scale Cor.     | 1.000         |
| Reset               | Off           |
| ? Ref. amplitude 1H | 0.000 V       |

**Physio - Signal1**

|                 |           |
|-----------------|-----------|
| 1st Signal/Mode | None      |
| TR              | 6450.0 ms |
| Concatenations  | 2         |

**Physio - Cardiac**

|                   |           |
|-------------------|-----------|
| Magn. preparation | None      |
| Fat suppr.        | None      |
| Dark blood        | Off       |
| FoV read          | 320 mm    |
| FoV phase         | 100.0 %   |
| Phase resolution  | 90 %      |
| Trajectory        | Cartesian |

**Physio - PACE**

|                |     |
|----------------|-----|
| Resp. control  | Off |
| Concatenations | 2   |

**Inline - Common**

|                      |     |
|----------------------|-----|
| Subtract             | Off |
| Measurements         | 1   |
| StdDev               | Off |
| Save original images | On  |

**Inline - MIP**

|                      |     |
|----------------------|-----|
| MIP-Sag              | Off |
| MIP-Cor              | Off |
| MIP-Tra              | Off |
| MIP-Time             | Off |
| Save original images | On  |

**Inline - Composing**

|                   |     |
|-------------------|-----|
| Inline Composing  | Off |
| Distortion Corr.  | On  |
| Mode              | 2D  |
| Unfiltered images | Off |

**Sequence - Part 1**

|                     |             |
|---------------------|-------------|
| Introduction        | On          |
| Dimension           | 2D          |
| Compensate T2 decay | Off         |
| Reduce Motion Sens. | On          |
| Contrasts           | 1           |
| Flow comp.          | No          |
| Multi-slice mode    | Interleaved |
| Free echo spacing   | Off         |
| Echo spacing        | 9.74 ms     |
| Bandwidth           | 199 Hz/Px   |

**Sequence - Part 2**

|                          |              |
|--------------------------|--------------|
| Define                   | Turbo factor |
| Echo trains per slice    | 14           |
| Phase correction         | Automatic    |
| Acoustic noise reduction | None         |
| RF pulse type            | Normal       |
| Gradient mode            | Normal       |
| WARP                     | Off          |
| Red. EC sensitivity      | Off          |
| Turbo factor             | 15           |

**Sequence - Assistant**

|               |      |
|---------------|------|
| Mode          | Off  |
| Allowed delay | 30 s |
